1  
2  
3  
4  
5  
6  
7  
8  
9  
10  
11  
12  
13  
14  
15  
16  
17  
18  
19  
20  
21  
22  
23  
24  
25  
26  
27  
28  
29  
30  
31  
32  
33  
34  
35  
36  
37  
38  
39  
40  
41  
42  
43  
44  
45

## Scaling laws of graphs of 3D protein structures

Jure Pražnikar <sup>\*1,2</sup>

<sup>1</sup> Faculty of Mathematics, Natural Sciences and Information Technologies, University of Primorska, Glagoljaška 8, Koper, Slovenia

<sup>2</sup> Department of Biochemistry, Molecular and Structural Biology, Institute Jožef Stefan, Jamova 39, Ljubljana, Slovenia

**\* Corresponding author:**

*E-mail:* [jure.praznikar@upr.si](mailto:jure.praznikar@upr.si)

## 46 **Abstract**

47 The application of graph theory in structural biology offers an alternative means of studying 3D  
48 models of large macromolecules, such as proteins. However, basic structural parameters still play  
49 an important role in the description of macromolecules. For example, the radius of gyration, which  
50 scales with exponent  $\sim 0.4$ , provides quantitative information about the compactness of the protein  
51 structure. In this study, we combine two proven methods, the graph-theoretical and the fundamental  
52 scaling laws, to study 3D protein models.

53 This study shows that the mean node degree of the protein graphs, which scales with exponent  
54 0.038, is scale-invariant. In addition, proteins that differ in size have a highly similar node degree  
55 distribution, which peaks at node degree 7, and additionally conforms to the same statistical  
56 properties at any scale. Linear regression analysis showed that the graph parameters (radius,  
57 diameter and mean eccentricity) can explain up to 90% of the total radius of gyration variance.  
58 Thus, the graph parameters of radius, diameter and mean eccentricity scale with the same exponent  
59 as the radius of gyration. The main advantage of graph eccentricity compared to the radius of  
60 gyration is that it can be used to analyse the distribution of the central and peripheral amino  
61 acids/nodes of the macromolecular structure. The central nodes are hydrophobic amino acids (Val,  
62 Leu, Ile, Phe), which tend to be buried, while the peripheral nodes are more hydrophilic residues  
63 (Asp, Glu, Lys). Furthermore, it has been shown that the number of central and peripheral nodes is  
64 more related to the fold of the protein than to the protein length.

65

66

67

68

69

70

71

## 72 **Introduction**

73 Proteins, molecules that serve many critical roles in nature, consist of complex systems of amino  
74 acids that have increasingly been modelled as networks over the last decade (1–3). There are many  
75 ways to abstract the 3D protein structure into a graph. We can consider  $C\alpha$ ,  $C\beta$  or all heavy atoms  
76 to construct an adjacency matrix. A typical method to abstract the protein model into a graph is to  
77 consider  $C\alpha$  atoms with 7.0 Å cut-off distance (4). We should be aware that some information is  
78 lost when the 3D model is abstracted into the graph, although it still captures relevant biochemical  
79 properties of the "real" 3D protein model. Once the 3D model of the protein is abstracted into a  
80 graph, we have several options to analyse the 3D structure by examining different parameters of the  
81 graph. Residue network models have been used to predict catalytic sites (5–8), to study protein  
82 dynamics (9), to discover node-amino acids that play crucial roles in protein folding (10,11), to  
83 explore allosteric pathways (12–14), and to analyse enzyme domain packing (15). In addition, graph  
84 theory has also been successfully used to validate PDB entries (16), to study local errors in protein  
85 models, and to discriminate decoys from the native structure (17,18). We should emphasize the  
86 importance of validation and quality assessment, since only correct protein structures can answer  
87 relevant biological questions (19–22).

88 However, we cannot expect that all graph parameters used and derived by mathematicians will have  
89 practical implications, for example, when studying specific phenomena in structural biology.

90 However, we should try to find a connection between theoretical graph parameters and biochemical  
91 phenomena that can lead to deeper insights.

92 Despite the obvious usefulness of graph theory for the analysis of protein structures, basic structural  
93 parameters still serve an important role in the description of macromolecules. For example, a  
94 common parameter used to describe the compactness of protein models is the radius of gyration  
95 (23–25). The radius of gyration of a macromolecule describes the distribution of atoms around the  
96 centre of mass. Since Flory's theory (26), the scaling law between the radius of gyration and the  
97 length of the protein has been studied in detail and used to describe protein folding, and to analyse

98 the compactness of protein structures in poor or good solvent conditions. It was found that the  
99 radius of gyration of globular protein structures, including monomers and oligomers, scales with  
100 exponent  $\sim 0.4$  (27). The radius of gyration can be used as a constraint when building protein models  
101 or performing molecular dynamics simulations. On the other hand, when the 3D model of a protein  
102 is not known, the scaling law provides qualitative information about the dimensions of the  
103 macromolecule.

104 This study links two well-established approaches, the graph-theoretical and the fundamental scaling  
105 laws, to study 3D protein models. In this paper, the PDB is surveyed to study scaling laws of 3D  
106 protein structures using a graph-theoretical approach. This research has demonstrated that the mean  
107 node degree of the protein graph is nearly scale-invariant. Additionally, the comparison of the node  
108 degree distributions of proteins of different sizes exhibits marginal differences. Furthermore, this  
109 study shows that the compactness of the protein, which is conventionally calculated by the radius of  
110 gyration, can be estimated using graph eccentricity, which also provides insights into central  
111 (buried) and peripheral (non-buried) amino acids.

112

## 113 **Methods**

### 114 **Dataset**

115 The Protein Sequence Culling Server (28) was used to obtain the PDB id list for protein structures  
116 with the following characteristics: maximum mutual sequence identity of 80%, X-ray resolution  
117 cut-off of 3.0 Å and minimum (maximum) chain length of 40 (10,000) residues. The PDB id list  
118 was then used to retrieve 31,571 Biological Assemblies from the Protein Data Bank.

119

### 120 **Graph Construction**

121 From each of the 31,571 3D Biological Assemblies, the graph was constructed and analysed.  $C\alpha$   
122 atoms were considered as nodes, and edges between nodes were constructed if the  $C\alpha$ – $C\alpha$  distance

123 between a pair of residues was less than (or equal to) 7 Å. It follows that the number of nodes was  
124 equal to the number of residues (C $\alpha$  atoms) in the protein. Ligands, water molecules, and other  
125 hetero-compounds were discarded during graph construction. Thus, if a protein has  $n$  residues, then  
126 a protein graph  $G = G(V, E)$  consists of a set of vertices (nodes)  $V = v_1 v_2, \dots v_n$  and a set of edges  
127  $E = e_1, e_2, \dots e_m$ .

128

## 129 **Graph parameters**

130 The mean node degree (MND) of a graph  $G$  is expressed with the ratio

$$131 \quad d(G) = \frac{2e(G)}{N(G)}$$

132 where  $e(G)$  represents the total number of edges in a graph  $G$ , and  $N(G)$  is the number of nodes in a  
133 graph  $G$ .

134 The eccentricity is a node centrality index defined as the maximum distance between a vertex to all  
135 other vertices. Thus, the vertex's eccentricity is the maximal shortest path between the vertex and all  
136 other vertices. Mean eccentricity is expressed as an average value of eccentricities of all vertices of  
137  $G$ . The radius of the graph is defined as a minimum eccentricity among all vertices in the graph.  
138 Meanwhile, the diameter is defined as maximum eccentricity among all vertices in the graph. The  
139 center of a graph or central node has eccentricity equal to the radius. A vertex is said to be a  
140 peripheral node if its eccentricity is equal to the diameter.

141 Next, R script (igraph package) was used to calculate mean node degree, eccentricity, mean  
142 eccentricity, radius and diameter:

```
143 MND <- mean(degree(G)) # mean node degree of graph G
```

```
144 EC <- eccentricity(G) # eccentricity of graph G
```

```
145 MEC <- mean(EC) # mean eccentricity of graph G
```

```
146 R <- min(EC) # radius of graph G, or min eccentricity of graph G
```

```
147 D <- max(EC) # diameter of graph G, or max eccentricity of graph G
```

148

## 149 **Radius of gyration**

150 Considering atoms as points in a three-dimensional space, the radius of gyration is defined as

$$151 \quad R_{\text{gyr}} = \sqrt{\frac{\sum m_i r_i^2}{M}}$$

152 where  $M$  is the total mass of the molecule, and  $m_i$  is the mass of the  $i$ -th atom with distance  $r_i$  from  
153 the centre of mass. Radius of gyration was calculated using the *rgyr* function, which is part of the  
154 Bio3D R package (29).

155

## 156 **Solvent accessibility of residues**

157 Secondary structure (total solvent-accessible area of proteins) was assigned according to the method  
158 of Kabsch and Sander (30,31). The solvent accessible area data for protein residues were taken from  
159 the work of Tien and co-workers (32).

160

161 **Table 1: Solvent accessibility of residues**

| <b>Residue</b> | <b>Solvent accessible area (Å<sup>2</sup>)</b> |
|----------------|------------------------------------------------|
| Alanine        | 121                                            |
| Arginine       | 265                                            |
| Asparagine     | 187                                            |
| Aspartate      | 187                                            |
| Cysteine       | 148                                            |
| Glutamate      | 214                                            |
| Glutamine      | 214                                            |
| Glycine        | 97                                             |
| Histidine      | 216                                            |
| Isoleucine     | 195                                            |
| Leucine        | 191                                            |
| Lysine         | 230                                            |
| Methionine     | 203                                            |
| Phenylalanine  | 228                                            |
| Proline        | 154                                            |
| Serine         | 143                                            |
| Threonine      | 163                                            |
| Tryptophan     | 264                                            |

|                |     |
|----------------|-----|
| Tyrosine       | 255 |
| Valine         | 165 |
|                |     |
| <b>Average</b> | 192 |

162

163

## 164 **Results and Discussion**

165

### 166 **Node degree-nearly scale-invariant**

167 One of the fundamental global graph parameters in graph theory is the mean node degree (MND).

168 The mean node degree shows how many edges each node has on average. In previous work,

169 Pražnikar and co-workers (33) have shown that protein models that deviate from the expected MND

170 by approximately two standard deviations or more are likely to be incorrect. Furthermore, the

171 scaling exponent calculated in the mentioned study is close to zero and indicates that the mean node

172 degree is nearly scale-invariant.

173 In this study, a large non-redundant database of biological units (31,571) was used, rather than

174 crystal asymmetric units. We can see in Figure 1A that MND is not strongly dependent on protein

175 size and that the distribution is rather narrow. Upon closer examination, however, the value

176 determined in our study (0.038) differs slightly from the value (0.024) determined in previous

177 study. The reason for the different scaling exponents is probably that the datasets are not the same.

178 An analysis performed on two large but different datasets shows that MND is nearly scale-invariant,

179 i.e., the scaling exponent is close to zero (0.024 and 0.038). Thus, MND is not strongly dependent

180 on protein length, and it can be concluded that the number of edges in the protein graph is linearly

181 related to the number of nodes (amino acids).

182

183 **Fig 1.** (A) Scaling exponent of mean node degree of protein graphs versus the number of residues.

184 (B) Probability of node degree of protein graphs for three size bins. The first size bin (black line)

185 encompasses protein structures with length between 100 and 200 residues, the second size bin (blue  
186 line) encompasses protein structures with length between 500 and 600 residues, and the third size  
187 bin encompasses structures with length between 900 and 1000 residues.

188

189 We could expect that larger proteins would have a higher average node degree because of a higher  
190 number of core residues and a relatively lower number of surface residues, which are supposed to  
191 have lower numbers of edges. Thus, to further analyse the node degree of protein nodes-residues,  
192 we calculated the node degree distribution for three different size bins. The first size bin contains all  
193 protein structures from the database, which have lengths between 100 and 200 residues, in the  
194 second size bin are proteins with lengths between 500 and 600 residues, and in the third size bin are  
195 structures with lengths between 900 and 1,000 residues. Figure 1B shows that all three distributions  
196 are very similar and that there is a peak at 7 node degrees. The comparison of all three peak values  
197 shows that the first size bin, which contains the smallest proteins, has the highest probability density  
198 value. The lowest probability density value at 7 node degree is seen for the third size bin, which  
199 contains the largest proteins among all three selected size bins. A closer look at the left (degree 2)  
200 and right (degree 14) tail of the distributions shows high similarity for all three distributions. The  
201 visual comparison shows the most significant differences on the left and right sides of the peak. The  
202 differences can be observed at values of approximately 5 to 9 node degrees. It can be seen that the  
203 first size bin has a higher probability at 3 to 6 node degrees as compared to size bins two and three.  
204 The order is somehow reversed on the right side of the displayed distribution. For node degrees 8, 9  
205 and 10, size bin three exhibits higher values compared with size bins two and three.

206 This analysis shows that despite the different sizes of the proteins, they have a very similar node  
207 degree distribution, which peaks at node degree 7. A simple way to explain the presented results is  
208 that buried residues in small or large proteins form approximately the same number of links. This is  
209 a direct consequence of the fact that the amino acids are physical objects and cannot be arbitrarily



210 close to each other. The marginal difference in node degree distributions, a slight shift to higher  
211 node degrees, explains the low positive scaling exponent (0.038), which is nearly scale-invariant.  
212

## 213 **Protein graph eccentricity: an alternative method for analysis of** 214 **radius of gyration**

215 It is easy to ask a question: radius of gyration and radius as a graph parameter have a common  
216 name, but do they follow the same power law? To answer this question, linear regression analysis  
217 and scaling exponent were calculated for three graph parameters: radius, diameter and mean  
218 eccentricity. The radius-graph parameter is defined as minimum eccentricity, whereas the  
219 eccentricity of the graph is defined as the maximum distance between one node and all other nodes.  
220 Notice that the diameter is defined as maximum eccentricity.

221 Figure 2A shows the scaling exponent of a radius of gyration for 31,571 selected protein structures.

222 The non-linear fitting function can be written as

$$223 R_{\text{gyr}}=R_0N^{\nu},$$

224 where  $R_{\text{gyr}}$  is the radius of gyration,  $R_0$  is the pre-factor and  $\nu$  is a scaling exponent. The pre-factor  
225  $R_0$  can be obtained experimentally and used as a restrained value during non-linear fitting (34–36).

226 Thus, when restrained fitting was performed, the pre-factor ( $R_0=2 \text{ \AA}$ ) was fixed. We can see that in  
227 the case of restrained fitting, the scaling exponent is 0.405, which is consistent with other studies.

228 When fitted without restraint, the exponent is lower (0.351). Both values are within the range  
229 reported by other studies (25,27,34,37–39).

230

231 **Fig 2.** Log-log plots of the radius of gyration (A), radius (B), diameter (C), and mean eccentricity  
232 (D) versus the number of residues. The solid red line is generated by fitting without restraint; the  
233 blue line is produced by restrained fitting. The legend shows unrestrained scaling factors in red. The  
234 restrained scaling factors and corresponding pre-factors are in blue.

235

236 Figure 2B, C, and D show radius, diameter, and mean eccentricity plotted against protein length.  
237 Similar to the analysis of the radius of gyration, the power exponent was fitted with and without  
238 restraint. The pre-factor for restrained fitting was derived from linear regression analysis, as shown  
239 in Figure 3. The linear regression analysis between the radius of gyration and graph parameters  
240 reveals that  $R^2$  is close to 0.90 for all three cases (Fig. 3). The highest  $R^2$  (0.91) is observed between  
241 mean eccentricity and radius of gyration (Fig. 3C). The reason for this is probably that the values of  
242 radius and diameter are discrete, while mean eccentricity values are not discrete. For example, the  
243 radius can be 7 or 8, but cannot be a real number between 7 and 8. Mean eccentricity is just a mean  
244 value of all shortest paths to any nodes. It is seen that the distribution of mean eccentricity is  
245 smoother in comparison to the discrete values of radius and diameter on the y-axis.

246

247 **Fig 3.** Scatter plot of graph parameters: radius (A), diameter (B), and mean eccentricity (C) versus  
248 radius of gyration. The legend shows the regression coefficient, R-squared value, and p-value.

249

250 If we use pre-factor  $R_0$  of a radius of gyration, which was obtained from experimental data, then we  
251 can calculate the pre-factors for radius, diameter, and mean eccentricity using the slope  $k$  from a  
252 regression analysis. The steepness of the linear regression model between  $R_{\text{gyr}}$  and radius was  $0.42$   
253  $\text{\AA}^{-1}$ ,  $0.77 \text{\AA}^{-1}$  between  $R_{\text{gyr}}$  and diameter, and  $0.59 \text{\AA}^{-1}$  between  $R_{\text{gyr}}$  and mean eccentricity (see Fig.  
254 3A, B and C). Using pre-factor  $R_0$  and the steepness of linear fit  $k$ , the pre-factors for radius,  
255 diameter and mean eccentricity can be calculated using the next expression:

$$256 \quad R_x = R_0 k, \quad (1)$$

257 where  $R_x$  is a new calculated pre-factor,  $R_0$  is the pre-factor of radius of gyration and  $k$  is the  
258 steepness of the linear fit. In Figure 2B, C and D are shown calculated pre-factors for radius ( $2.0 \text{\AA}$   
259  $0.42 \text{\AA}^{-1} = 0.84$ ), diameter ( $2.0 \text{\AA} 0.77 \text{\AA}^{-1} = 1.54$ ) and mean eccentricity ( $2.0 \text{\AA} 0.59 \text{\AA}^{-1} = 1.18$ ).

260 We can see that the restrained scaling exponent is higher than the non-restrained scaling exponent  
261 for all three cases. Furthermore, it is observed that restrained graph parameters all have very similar

262 scaling exponents ( $\sim 0.395$ ) which are very close to the scaling exponent of the radius of gyration  
263 (0.405).  
264 Thus, this study shows that the radius of gyration, which is calculated from the atomic coordinates  
265 and radius of graph follow the same scaling exponent. From this we can conclude that when  
266 analysing 3D models of macromolecules using a graph-theoretical theory approach, the eccentricity  
267 of the graph can be used to estimate the radius of gyration. Thus, graph parameter eccentricity  
268 allows us to investigate whether the 3D protein model deviates from the expected value of the  
269 radius of gyration and to obtain information about the compactness of the structure. Furthermore,  
270 when a scientist builds a model, and the model is still in an early phase, e.g., as an alanine chain,  
271 then the  $C\alpha$  only model, which can be represented as a graph, contains enough information to  
272 estimate the radius of gyration.

273

## 274 **Central and peripheral nodes**

275 In the previous section, the relation between the radius of gyration and graph eccentricity was  
276 introduced. When exploring graph eccentricity, it is ubiquitous to examine which nodes-amino  
277 acids are central (close to every other node) and peripheral (distant from every other node). This  
278 kind of analysis has some common points with analysis of solvent-exposed residues, which is  
279 directly related to the arrangement of residues in 3D space. Buried residues constitute the core of  
280 the protein; meanwhile, residues exposed to the solvent represent the outer part of the protein in 3D  
281 space (40). The molecular mass of a protein is related with the total solvent exposed surface using  
282 the next expression:

$$283 \quad A_{monomer} = 4.44M^{0.770}, \quad (2)$$

284 where  $M$  is the molecular mass of the protein (41). Similarly, we can introduce the relation between  
285 protein length and total solvent-exposed surface. Given that the average amino acid has a total  
286 solvent exposed area of  $192\text{\AA}^2$  (32), we can use this value as a restraint during data fitting. Figure 4  
287 shows the protein length against the total exposed area. The scaling exponent of the fitted curve is

288 0.772, almost the same as the exponent in equation 2. This result was somehow expected because  
289 molecular mass correlates with sequence length.

290

291 **Fig 4.** Dependence of total solvent accessible area on the number of residues in proteins. The legend  
292 shows the scaling exponent and pre-factor ( $A_0$ ), which was used during restrained fitting.

293

294 However, a closer examination of the relationship between the number of central (peripheral) nodes  
295 and protein length demonstrated that the numbers of central and peripheral residues are not related  
296 to the protein size (Figure 5A, B). To further support this finding, the comparison between the  
297 radius of gyration, mean eccentricity, and numbers of central and peripheral residues for nine  
298 different size bins was made. We can see (Figure 6) that the mean eccentricity and radius of  
299 gyration increase according to the length of the protein. Note that the scaling exponent for both  
300 mentioned parameters is approximately 0.4 (Figure 2). On the other hand, central and peripheral  
301 box plots do not show such a positive trend (Figure 6C, D). It follows that the numbers of  
302 peripheral and central residues are not related to the protein size.

303

304 **Fig 5.** Distribution of central/peripheral residues against the size of proteins (number of residues).

305

306 **Fig 6.** Boxplot of the radius of gyration (A), mean eccentricity (B), number of peripheral nodes (C),  
307 and number of central nodes (D) for ten different size bins.

308

309 Next, we examine the case with different central to peripheral node ratio, which is shown as a graph  
310 and ribbon representation of two protein structures (Figure 7 A, B, D, and C). The PDB id: 1pq7  
311 structure has a low number of central nodes (4), but a high number of peripheral nodes (47): see  
312 Figures 7A and B. The situation is somehow reversed for the PDB id: 3wvj structure, which has a  
313 higher number of central nodes (34) and lower number of peripheral nodes (2): see Figure 7D, E.

314 This case shows that the numbers of central and peripheral nodes depend on the protein fold rather  
315 than on the length of the protein chain. Furthermore, we can draw parallels between *almost-*  
316 *peripheral* (42), *self-centred* (43), and protein graphs. Figure 7E shows the wheel, a graph that is  
317 *almost-peripheral*, containing only one central node and 6 peripheral nodes. Meanwhile, the graph  
318 shown in Figure 7F is an almost *self-centred* graph that contains 5 central nodes and 2 peripheral  
319 nodes. We could say that the graph abstracted from the PDB id: 3wvj structure is centred, while  
320 peripheral nodes-amino acids dominate the PDB id: 1pq7 structure.

321

322 **Fig 7.** Examples of central and peripheral protein graphs. (A) Graph and (B) ribbon presentation of  
323 Biological Assembly 1 of PDB entry 1pq7. (D) Graph and (C) ribbon presentation of Biological  
324 Assembly 1 of PDB entry 3wvj. (E) Presents an almost peripheral graph, while (F) represents an  
325 almost self-centred graph.

326

327 Further analysis shows the frequency distribution of central and peripheral amino acids (Figure 8),  
328 which are subdivided into three groups: (i) charged, (ii) polar, and (iii) non-polar side chains. It can  
329 be seen that amino acids histidine, cysteine, methionine, and tryptophan have the lowest probability  
330 values; it follows that they are neither central nor peripheral nodes. Further, we can see that central  
331 nodes are hydrophobic amino acids (Val, Leu, Ile, Phe), which tend to be buried, while peripheral  
332 nodes are more likely hydrophilic residues (Asp, Glu, Lys) which form hydrogen bonds with  
333 solvent.

334

335 **Fig 8.** Probability density of central and peripheral nodes for different types of amino acids.

336

337 Thus, when the 3D protein structure is analysed using graph theory, the eccentricity of the graph  
338 can be very strong for evaluating the radius of gyration when studying central nodes, which tend to  
339 be hydrophobic amino acids, and peripheral nodes, which tend to be hydrophilic amino acids. It is

340 remarkable that this graph parameter (eccentricity) allowed us to study the compactness ( $R_{gyr}$ ) of the  
341 protein and the arrangement of the residues (buried/not buried), making it versatile and useful for  
342 the analysis of 3D macromolecules.

343

## 344 **Conclusion**

345 This study showed that the mean node degree of the protein graph is nearly scale-invariant. In other  
346 words, a small scaling exponent (0.038) indicates that the mean node degree is scale-free. Scale  
347 invariance was further supported by the analysis of node degree distribution, which showed very  
348 similar node degree distributions for proteins that differ according to size. This scale invariably  
349 offers a valuable tool for validating structures by simply counting the number of edges.

350 Furthermore, an additional comparison between the expected node degree and node degree of a  
351 candidate could be used to explore and interpret large deviations. For example, intrinsically  
352 disordered proteins are expected to have a considerably lower mean node degree than globular  
353 proteins of the same size.

354 The comparison between the mean eccentricity of the graph and radius of gyration revealed a high  
355  $R^2$ . In other words, the mean eccentricity and radius of gyration follow the same scaling exponent  
356 ( $\sim 0.4$ ). The eccentricity of the graph, in addition to the estimation of the radius of gyration, also  
357 allows us to study the distribution of central (buried) and peripheral amino acids (non-buried). We  
358 should be aware that the mean eccentricity alone (or radius of gyration), which is used as a  
359 constraint when running molecular dynamics simulations or manually building a model, does not  
360 provide the correctness of the protein model. It is also crucial to determine how the amino acids are  
361 distributed in real space, and this can be elucidated by studying peripheral and central nodes. Thus,  
362 a single graph parameter (eccentricity) can be used to control the compactness of the  
363 macromolecule and the distribution of amino acids in 3D space, which makes it a valuable tool for  
364 analysing protein models.

365

## 366 **Acknowledgement**

367 This work was supported by Structural Biology grant P1-0048 and Infrastructure programme grant  
368 I0-0035-2790, provided by the Slovenian Research Agency.

369

## 370 **References**

- 371 1. Estrada E. Universality in protein residue networks. *Biophys J* [Internet]. 2010;98(5):890–  
372 900. Available from: <http://dx.doi.org/10.1016/j.bpj.2009.11.017>
- 373 2. Greene LH. Protein structure networks. *Brief Funct Genomics*. 2012;11(6):469–78.
- 374 3. Vishveshwara S, Brinda K V., Kannan N. Protein Structure: Insights From Graph Theory. *J*  
375 *Theor Comput Chem*. 2002;01(01):187–211.
- 376 4. da Silveira CH, Pires DE V., Minardi RC, Ribeiro C, Veloso CJM, Lopes JCD, et al. Protein  
377 cutoff scanning: A comparative analysis of cutoff dependent and cutoff free methods for  
378 prospecting contacts in proteins. *Proteins Struct Funct Bioinforma* [Internet]. 2009 Feb 15  
379 [cited 2017 Mar 15];74(3):727–43. Available from: <http://doi.wiley.com/10.1002/prot.22187>
- 380 5. del Sol A, Fujihashi H, Amoros D, Nussinov R. Residue centrality, functionally important  
381 residues, and active site shape: Analysis of enzyme and non-enzyme families. *Protein Sci*  
382 [Internet]. 2006 Sep 28;15(9):2120–8. Available from:  
383 <http://www.ncbi.nlm.nih.gov/pmc/articles/PMC2242611/>
- 384 6. Thibert B, Bredesen DE, del Rio G. Improved prediction of critical residues for protein  
385 function based on network and phylogenetic analyses. *BMC Bioinformatics* [Internet]. 2005  
386 Aug 26;6:213. Available from: <http://www.ncbi.nlm.nih.gov/pmc/articles/PMC1208857/>
- 387 7. Wangikar PP, Tendulkar A V, Ramya S, Mali DN, Sarawagi S. Functional Sites in Protein  
388 Families Uncovered via an Objective and Automated Graph Theoretic Approach. *J Mol Biol*  
389 [Internet]. 2003 Feb 21;326(3):955–78. Available from:  
390 <http://www.sciencedirect.com/science/article/pii/S0022283602013840>

- 391 8. Chea E, Livesay DR. How accurate and statistically robust are catalytic site predictions based  
392 on closeness centrality? *BMC Bioinformatics*. 2007;8:153.
- 393 9. Atilgan AR, Akan P, Baysal C. Small-world communication of residues and significance for  
394 protein dynamics. *Biophys J [Internet]*. 2004;86(1 Pt 1):85–91. Available from:  
395 [http://dx.doi.org/10.1016/S0006-3495\(04\)74086-2](http://dx.doi.org/10.1016/S0006-3495(04)74086-2)
- 396 10. Vendruscolo M, Dokholyan N V., Paci E, Karplus M. Small-world view of the amino acids  
397 that play a key role in protein folding. *Phys Rev E Stat Nonlin Soft Matter Phys*.  
398 2002;65(6):4.
- 399 11. Vendruscolo M, Paci E, Dobson CM, Karplus M. Three key residues form a critical contact  
400 network in a protein folding transition state. *Nature [Internet]*. 2001 Feb 1;409(6820):641–5.  
401 Available from: <http://dx.doi.org/10.1038/35054591>
- 402 12. Negre CFA, Morzan UN, Hendrickson HP, Pal R, Lisi GP, Loria JP, et al. Eigenvector  
403 centrality for characterization of protein allosteric pathways. *Proc Natl Acad Sci [Internet]*.  
404 2018 Dec 26;115(52):E12201 LP-E12208. Available from:  
405 <http://www.pnas.org/content/115/52/E12201.abstract>
- 406 13. Daily MD, Upadhyaya TJ, Gray JJ. Contact rearrangements form coupled networks from  
407 local motions in allosteric proteins. *Proteins*. 2008 Apr;71(1):455–66.
- 408 14. Daily MD, Gray JJ. Allosteric communication occurs via networks of tertiary and quaternary  
409 motions in proteins. *PLoS Comput Biol*. 2009;5(2).
- 410 15. Pintar S, Borišek J, Usenik A, Perdih A, Turk D. Domain sliding of two *Staphylococcus*  
411 *aureus* N-acetylglucosaminidases enables their substrate-binding prior to its catalysis.  
412 *Commun Biol*. 2020;3(1):1–9.
- 413 16. Pražnikar J, Tomić M, Turk D. Validation and quality assessment of macromolecular  
414 structures using complex network analysis. *Sci Rep*. 2019 Dec 1;9(1).
- 415 17. Chatterjee S, Bhattacharyya M, Vishveshwara S. Network properties of protein-decoy  
416 structures. *J Biomol Struct Dyn [Internet]*. 2012;29(6):1110–26. Available from:



- 417 <https://doi.org/10.1080/07391102.2011.672625>
- 418 18. Chatterjee S, Ghosh S, Vishveshwara S. Network properties of decoys and CASP predicted  
419 models: A comparison with native protein structures. *Mol Biosyst.* 2013;9(7):1774–88.
- 420 19. Kleywegt GJ. Validation of protein crystal structures. *Acta Crystallogr Sect D Biol*  
421 *Crystallogr.* 2000;56(3):249–65.
- 422 20. Read RJ, Adams PD, Arendall WB, Brunger AT, Emsley P, Joosten RP, et al. A new  
423 generation of crystallographic validation tools for the Protein Data Bank. *Structure.*  
424 2011;19(10):1395–412.
- 425 21. Wlodawer A, Minor W, Dauter Z, Jaskolski M. Protein crystallography for non-  
426 crystallographers, or how to get the best (but not more) from published macromolecular  
427 structures. *FEBS J.* 2008;275(1):1–21.
- 428 22. Benkert P, Biasini M, Schwede T. Toward the estimation of the absolute quality of individual  
429 protein structure models. *Bioinformatics.* 2011;27(3):343–50.
- 430 23. Lobanov MY, Bogatyreva NS, Galzitskaya O V. Radius of gyration as an indicator of protein  
431 structure compactness. *Mol Biol.* 2008;42(4):623–8.
- 432 24. Enright MB, Leitner DM. Mass fractal dimension and the compactness of proteins. *Phys Rev*  
433 *E - Stat Nonlinear, Soft Matter Phys.* 2005;71(1):1–9.
- 434 25. Hong L, Lei J. Scaling law for the radius of gyration of proteins and its dependence on  
435 hydrophobicity. *J Polym Sci Part B Polym Phys [Internet].* 2009;47(2):207–14. Available  
436 from: <https://onlinelibrary.wiley.com/doi/abs/10.1002/polb.21634>
- 437 26. Flory PJ. The Configuration of Real Polymer Chains. *J Chem Phys [Internet].*  
438 1949;17(3):303–10. Available from: <https://doi.org/10.1063/1.1747243>
- 439 27. Tanner JJ. Empirical power laws for the radii of gyration of protein oligomers. *Acta*  
440 *Crystallogr Sect D Struct Biol.* 2016;72:1119–29.
- 441 28. Wang G, Dunbrack Jr RL. PISCES: a protein sequence culling server. *Bioinformatics*  
442 [Internet]. 2003 Aug 12;19(12):1589–91. Available from:

- 443 <https://doi.org/10.1093/bioinformatics/btg224>
- 444 29. Grant BJ, Rodrigues APC, ElSawy KM, McCammon JA, Caves LSD. Bio3d: An R package  
445 for the comparative analysis of protein structures. *Bioinformatics*. 2006;22(21):2695–6.
- 446 30. Kabsch W, Sander C. Dictionary of protein secondary structure: pattern recognition of  
447 hydrogen-bonded and geometrical features. *Biopolymers*. 1983 Dec;22(12):2577–637.
- 448 31. Touw WG, Baakman C, Black J, Te Beek TAH, Krieger E, Joosten RP, et al. A series of  
449 PDB-related databanks for everyday needs. *Nucleic Acids Res*. 2015;43(D1):D364–8.
- 450 32. Tien MZ, Meyer AG, Sydykova DK, Spielman SJ, Wilke CO. Maximum allowed solvent  
451 accessibilities of residues in proteins. *PLoS One*. 2013;8(11).
- 452 33. Pražnikar J, Tomić M, Turk D. Validation and quality assessment of macromolecular  
453 structures using complex network analysis. *Sci Rep [Internet]*. 2019;9(1):1678. Available  
454 from: <https://doi.org/10.1038/s41598-019-38658-9>
- 455 34. Hofmann H, Soranno A, Borgia A, Gast K, Nettels D, Schuler B. Polymer scaling laws of  
456 unfolded and intrinsically disordered proteins quantified with single-molecule spectroscopy.  
457 *Proc Natl Acad Sci U S A*. 2012;109(40):16155–60.
- 458 35. Kohn JE, Millett IS, Jacob J, Zagrovic B, Dillon TM, Cingel N, et al. Random-coil behavior  
459 and the dimensions of chemically unfolded proteins. *Proc Natl Acad Sci U S A*. 2004  
460 Aug;101(34):12491–6.
- 461 36. Wilkins DK, Grimshaw SB, Receveur V, Dobson CM, Jones JA, Smith LJ. Hydrodynamic  
462 Radii of Native and Denatured Proteins Measured by Pulse Field Gradient NMR Techniques.  
463 *Biochemistry [Internet]*. 1999 Dec 1;38(50):16424–31. Available from:  
464 <https://doi.org/10.1021/bi991765q>
- 465 37. Dima RI, Thirumalai D. Asymmetry in the Shapes of Folded and Denatured States of  
466 Proteins. *J Phys Chem B [Internet]*. 2004 May 1;108(21):6564–70. Available from:  
467 <https://doi.org/10.1021/jp037128y>
- 468 38. Gong H, Fleming PJ, Rose GD. Building native protein conformation from highly

- 469 approximate backbone torsion angles. Proc Natl Acad Sci U S A [Internet]. 2005 Nov  
470 8;102(45):16227 LP – 16232. Available from:  
471 <http://www.pnas.org/content/102/45/16227.abstract>
- 472 39. Hinsen K, Hu S, Kneller GR, Niemi AJ. A comparison of reduced coordinate sets for  
473 describing protein structure. J Chem Phys [Internet]. 2013;139(12):124115. Available from:  
474 <https://doi.org/10.1063/1.4821598>
- 475 40. Miller S, Janin J, Lesk AM, Chothia C. Interior and surface of monomeric proteins. J Mol  
476 Biol. 1987 Aug;196(3):641–56.
- 477 41. Marsh JA. Buried and accessible surface area control intrinsic protein flexibility. J Mol Biol  
478 [Internet]. 2013;425(17):3250–63. Available from:  
479 <http://dx.doi.org/10.1016/j.jmb.2013.06.019>
- 480 42. Klavzar S, Narayankar KP, Walikar HB, Lokesh SB. Almost-Peripheral Graphs. Taiwan J  
481 Math. 2014;18:463–71.
- 482 43. Klavžar S, Narayankar KP, Walikar HB. Almost self-centered graphs. Acta Math Sin Engl  
483 Ser [Internet]. 2011;27(12):2343–50. Available from: [https://doi.org/10.1007/s10114-011-](https://doi.org/10.1007/s10114-011-9628-3)  
484 9628-3

485

## 486 **Data availability**

487 The data is freely available on github at <https://github.com/jure-praznikar/Scaling-laws>.

488

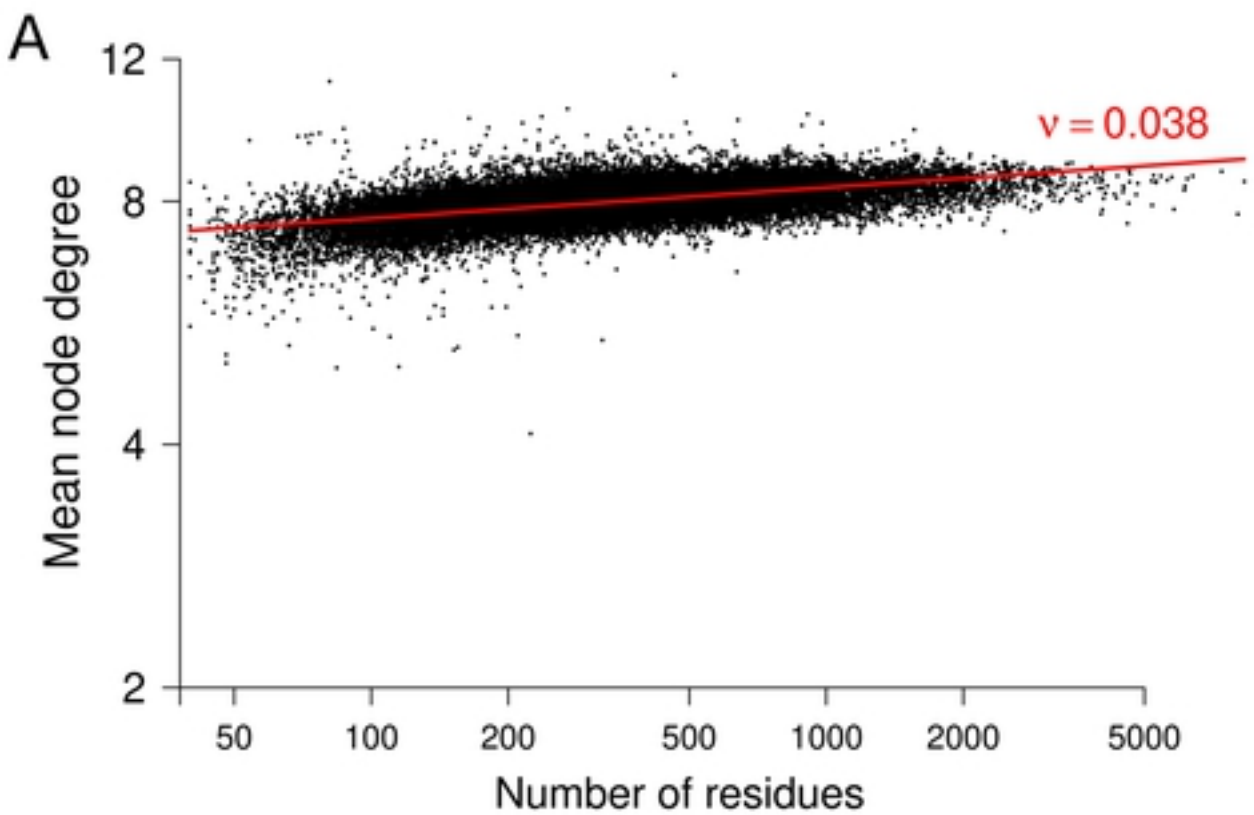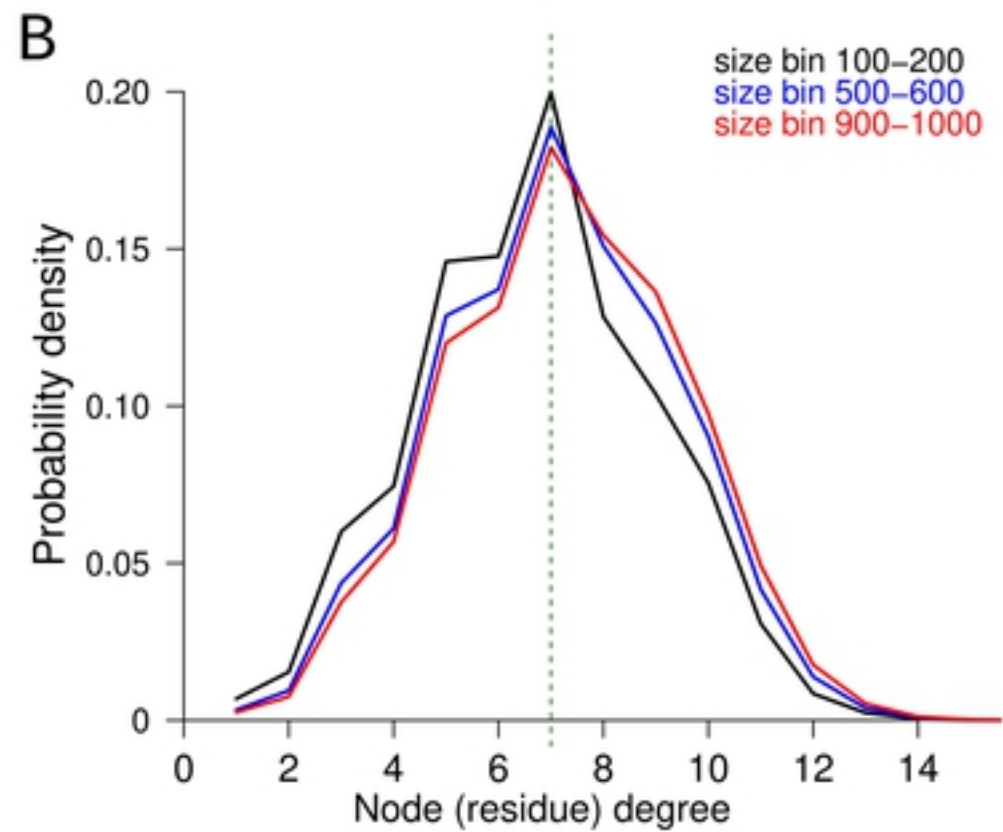

Figure 1

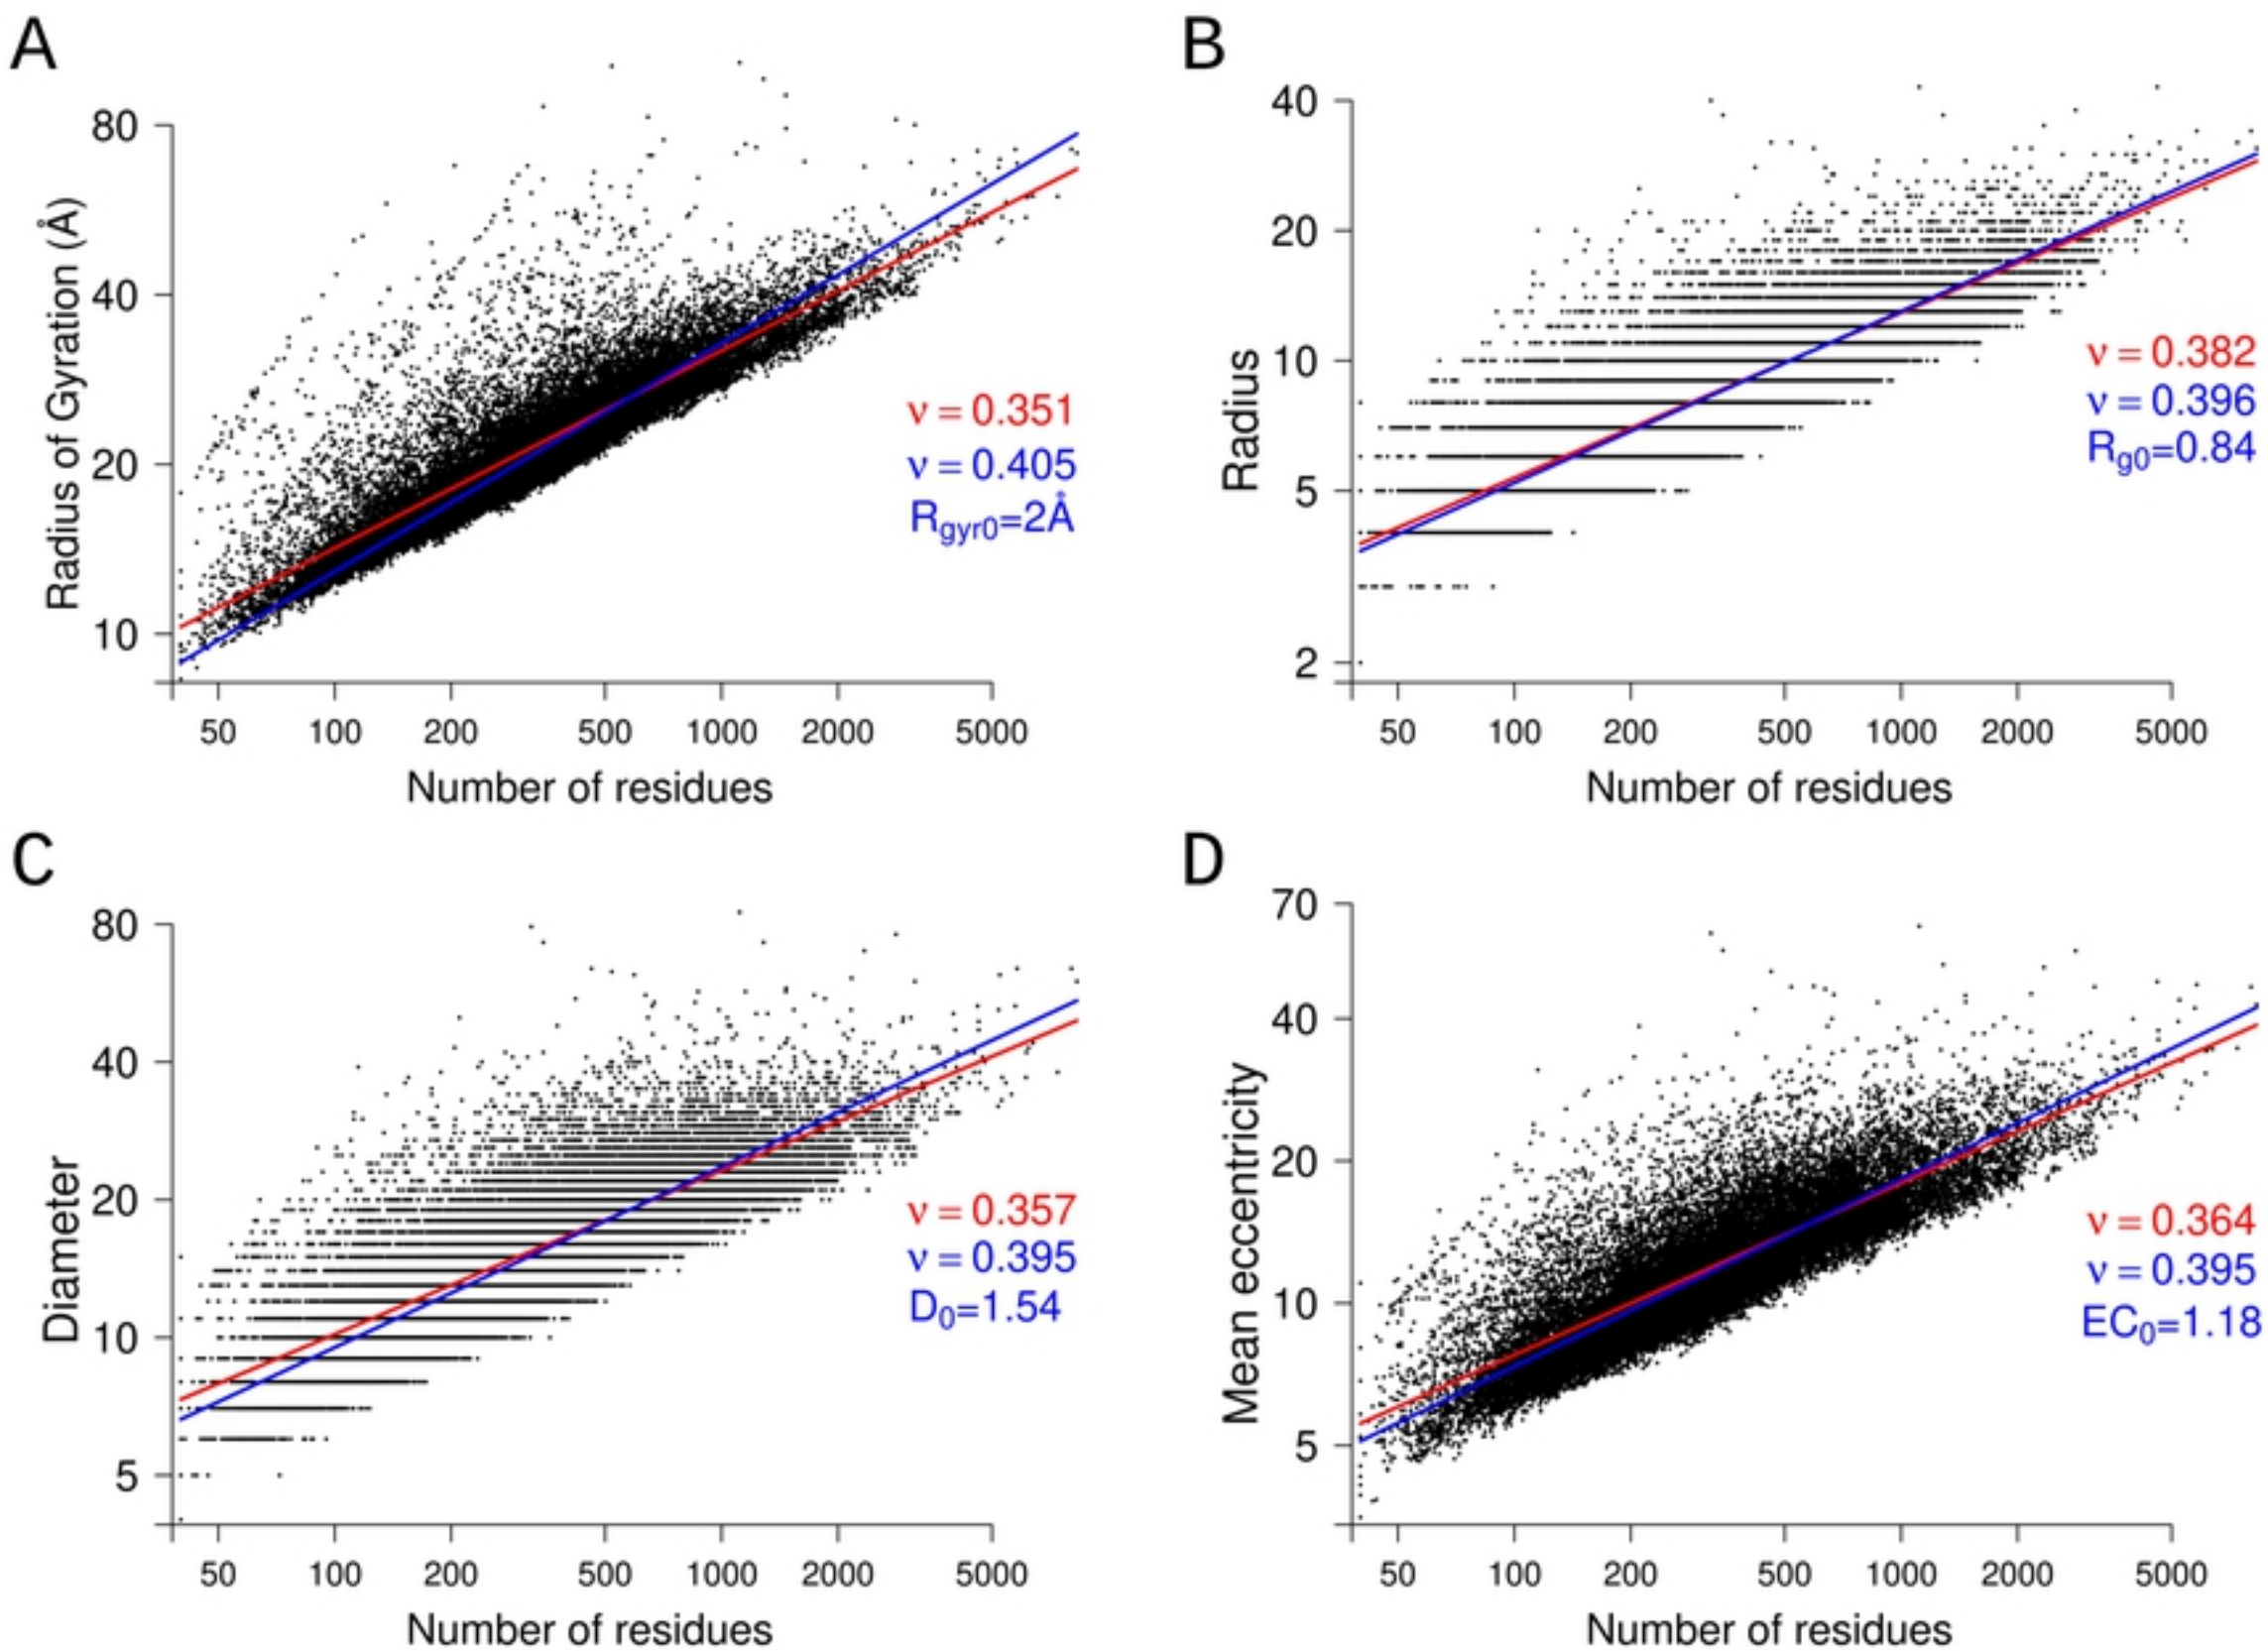

Figure 2

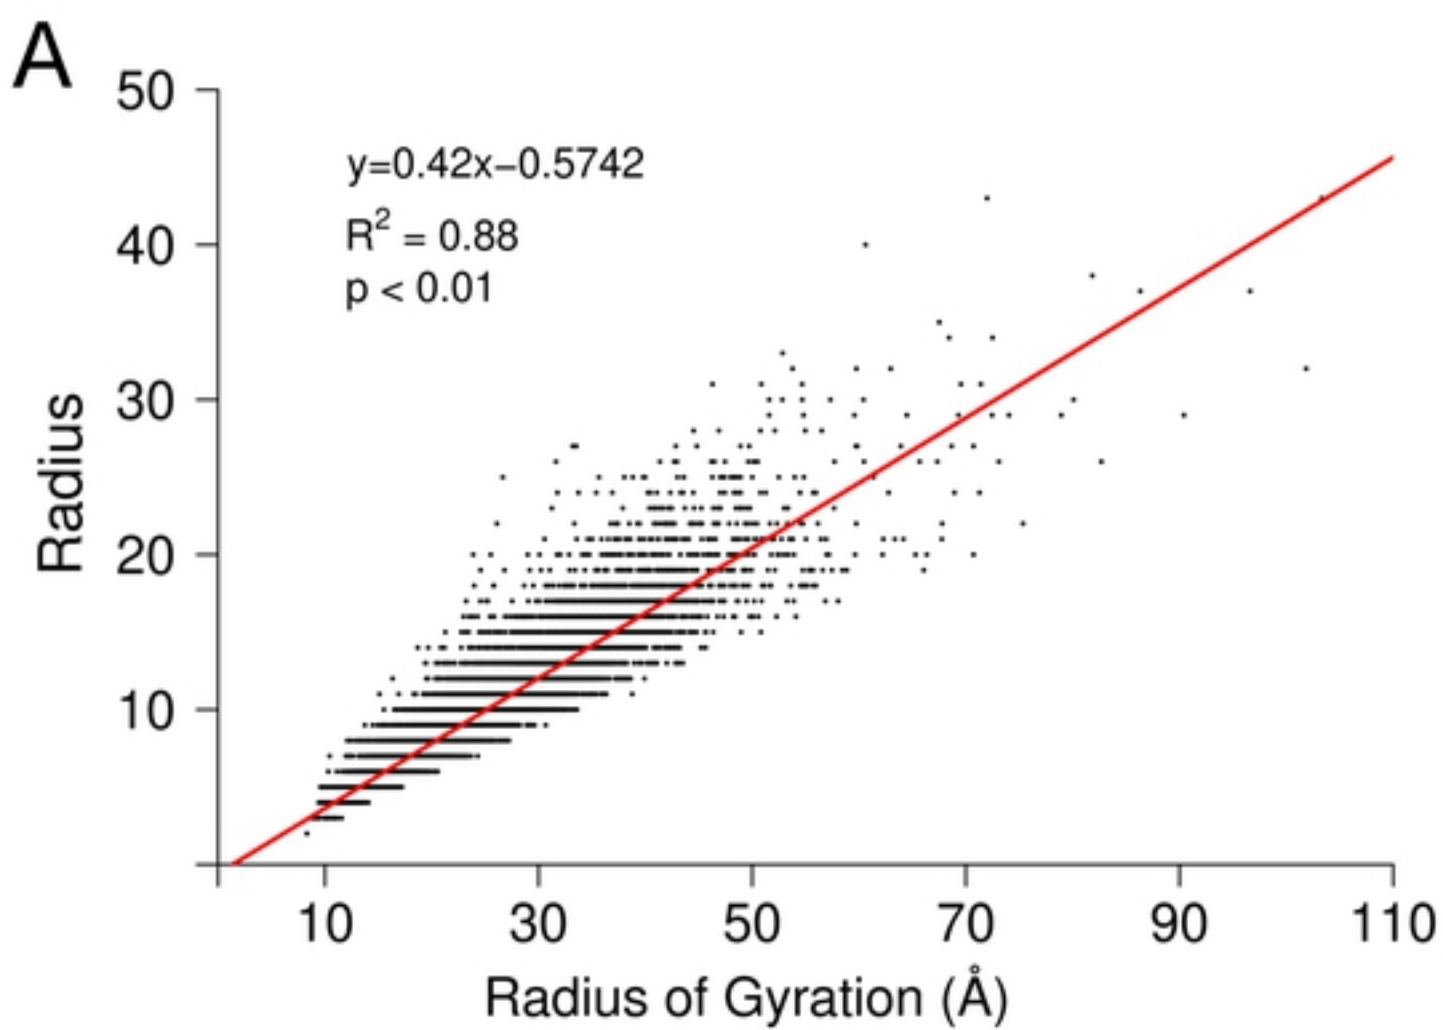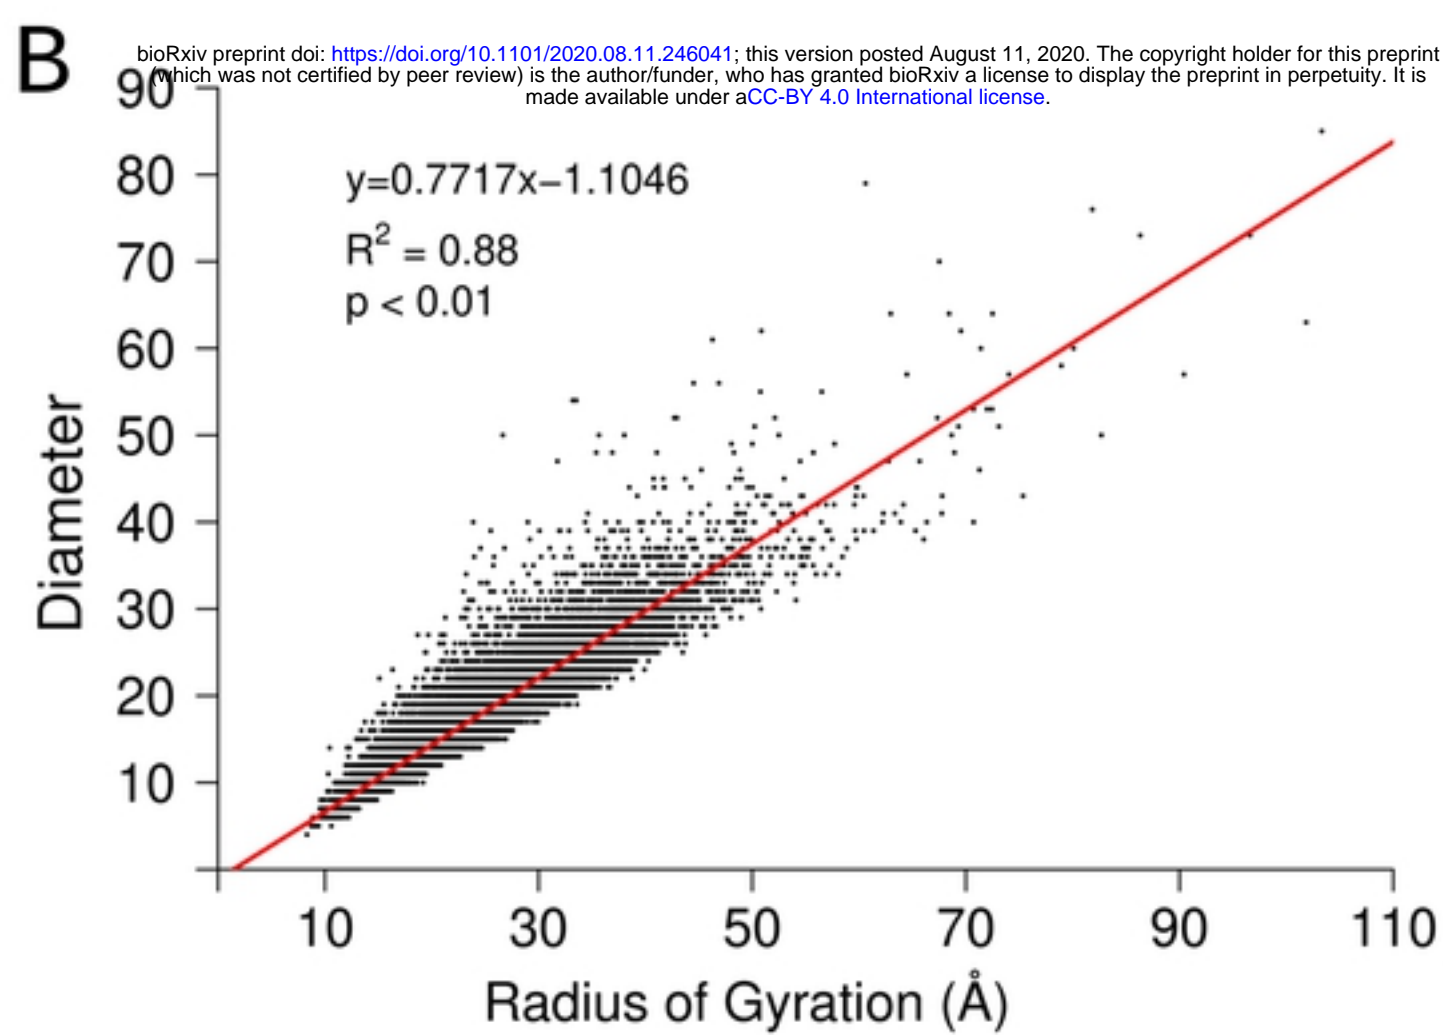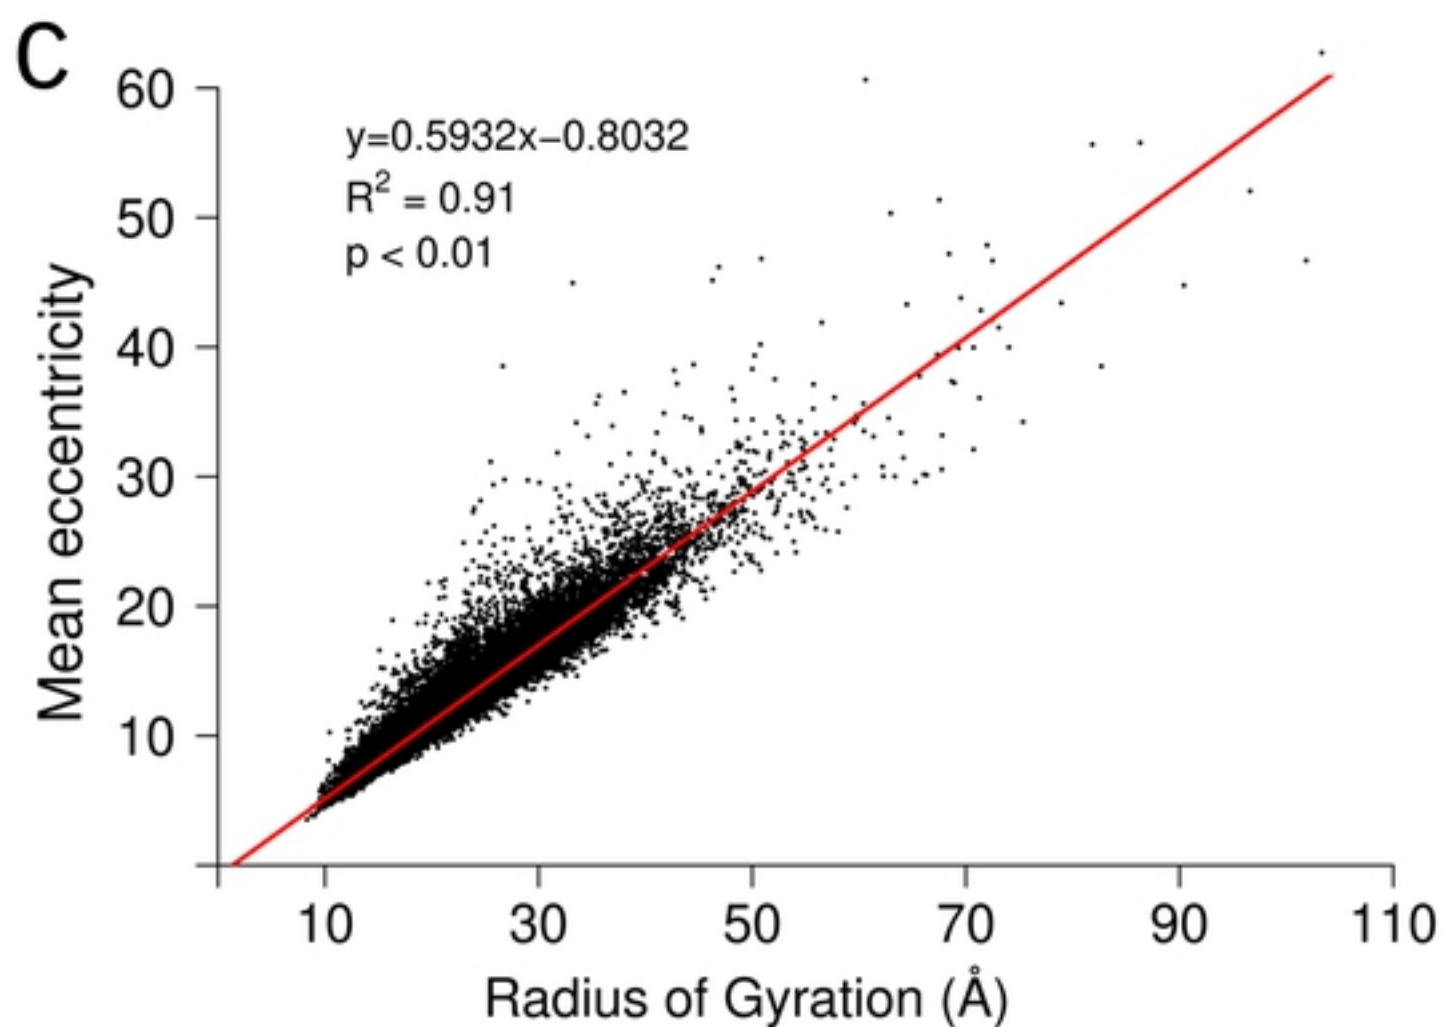

Figure 3

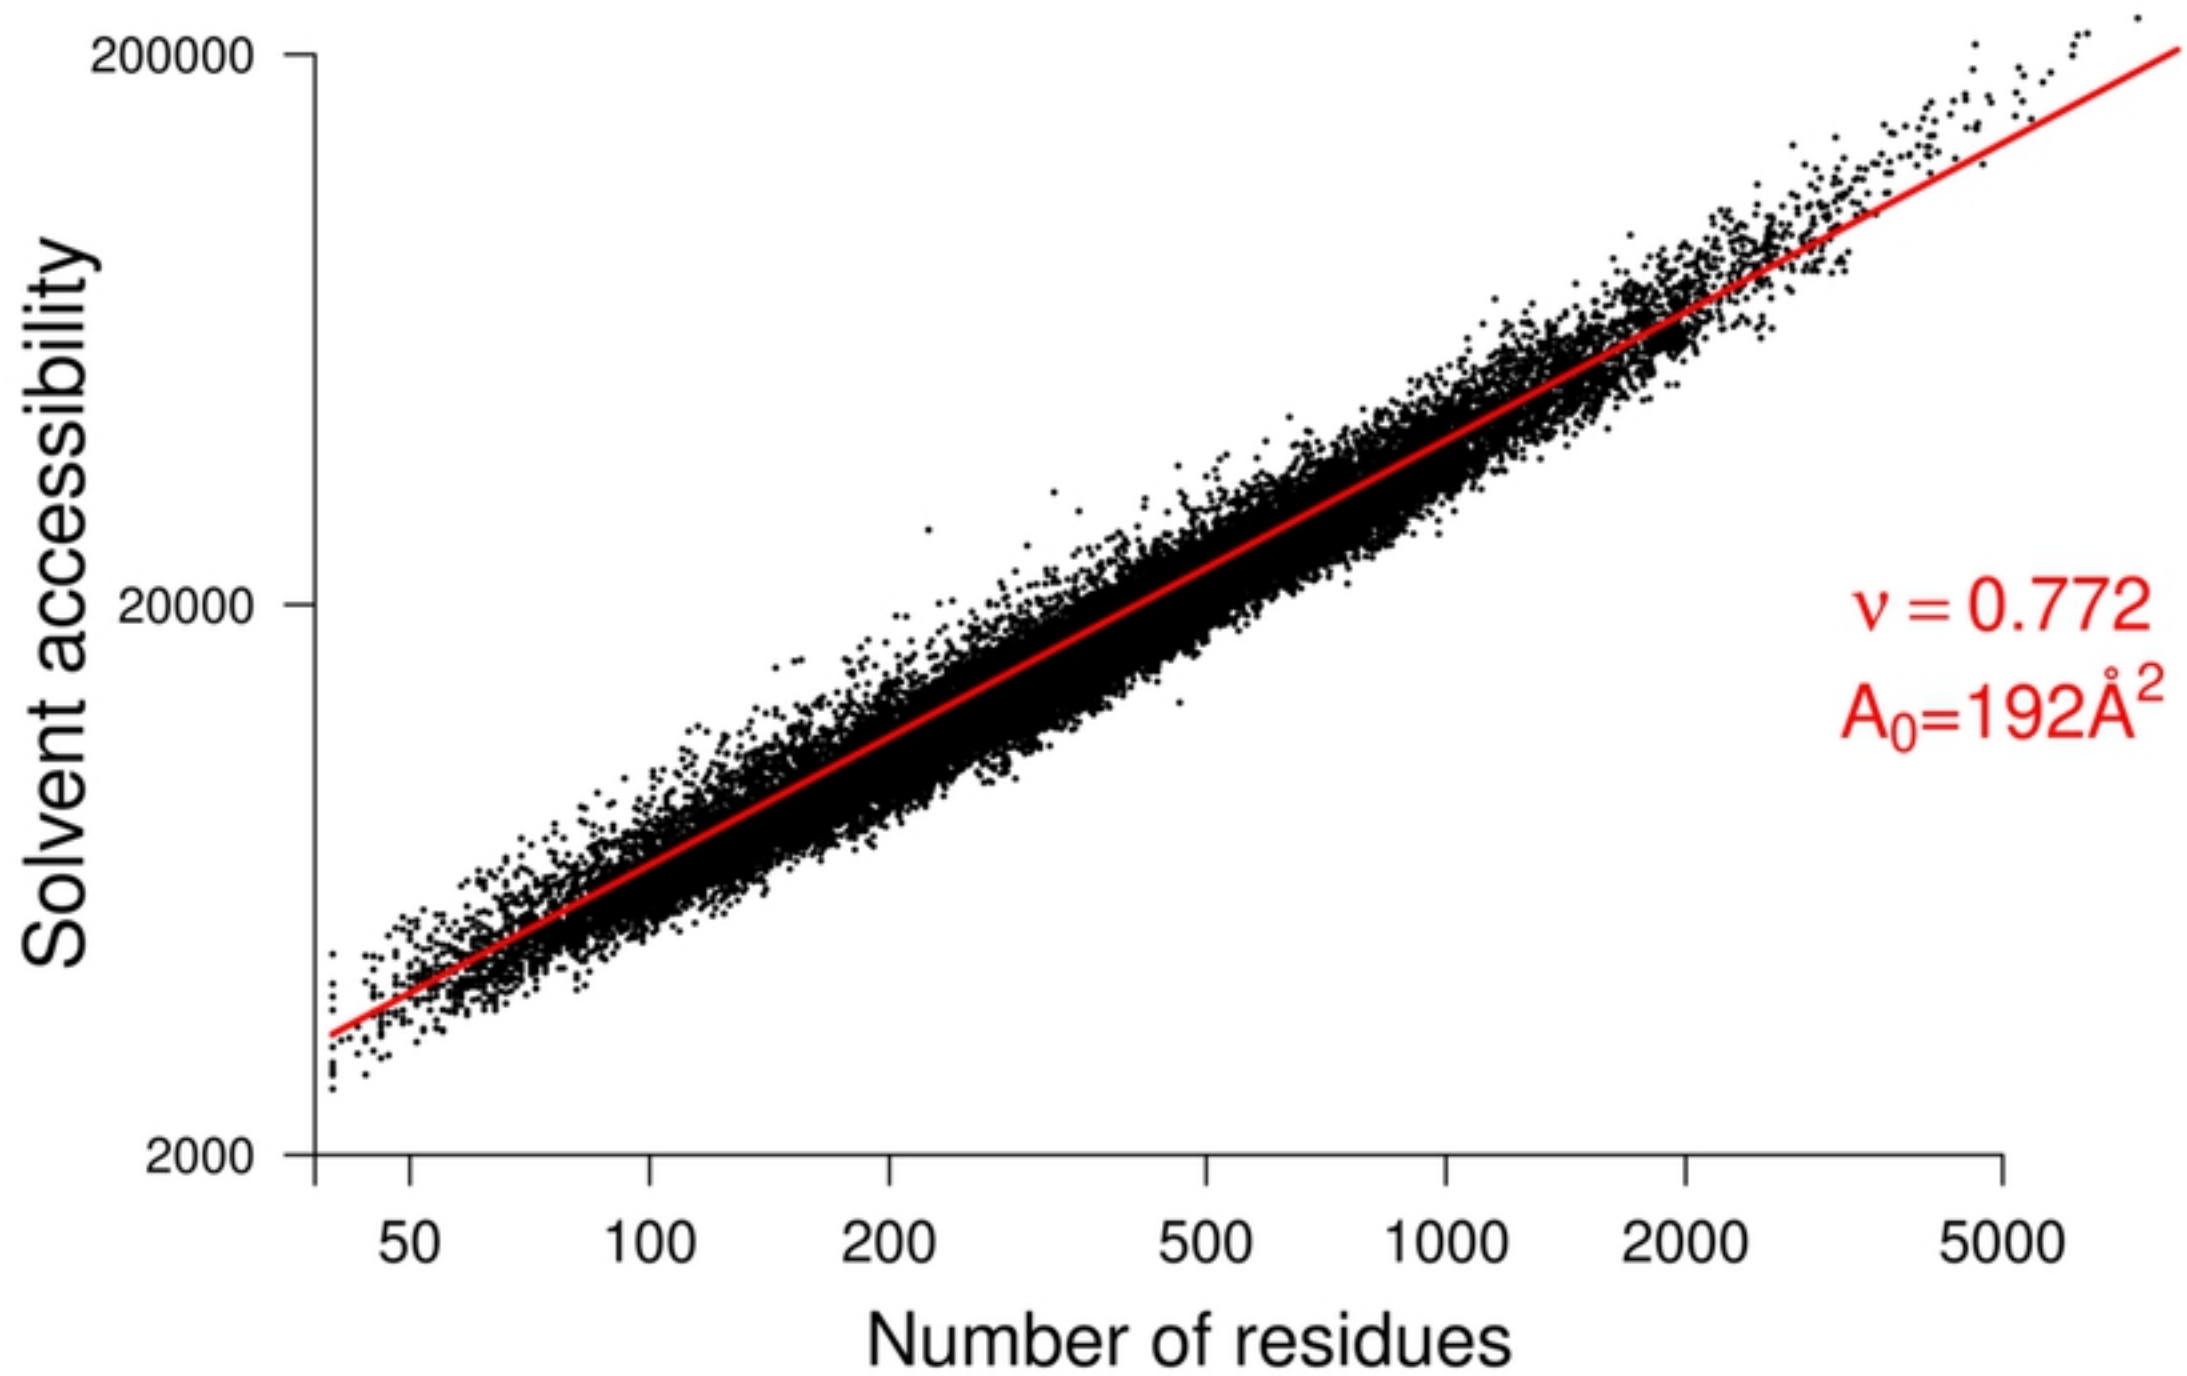

Figure 4

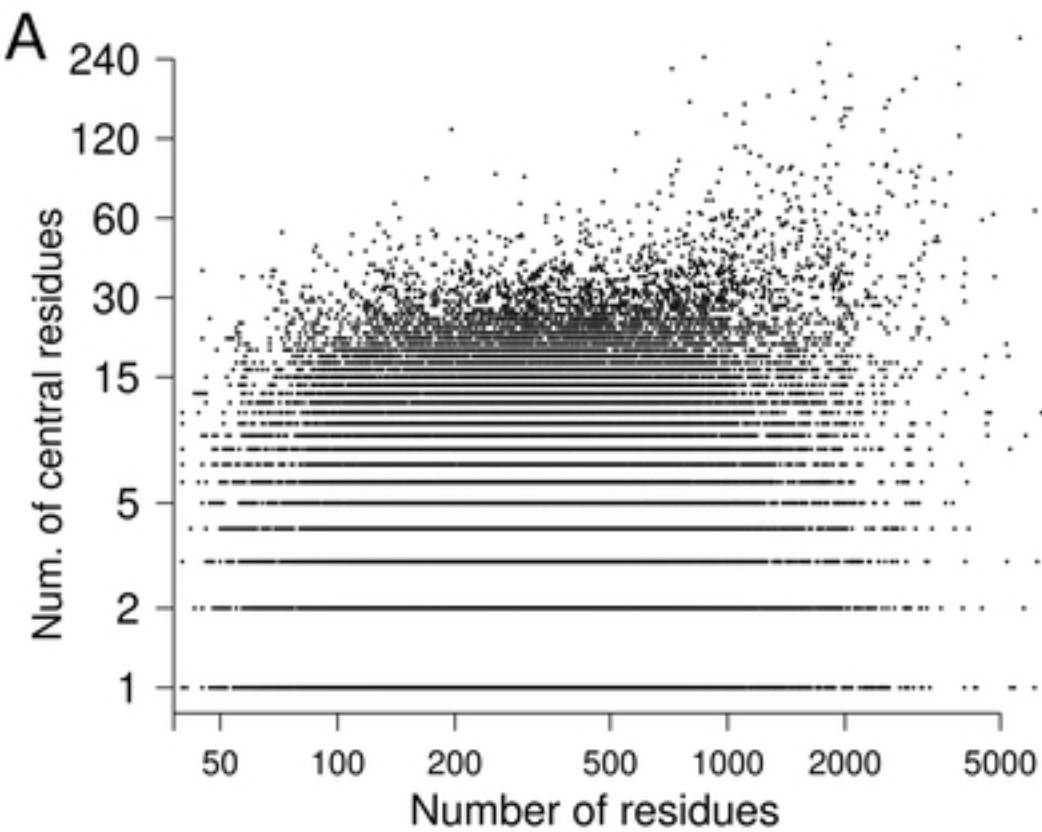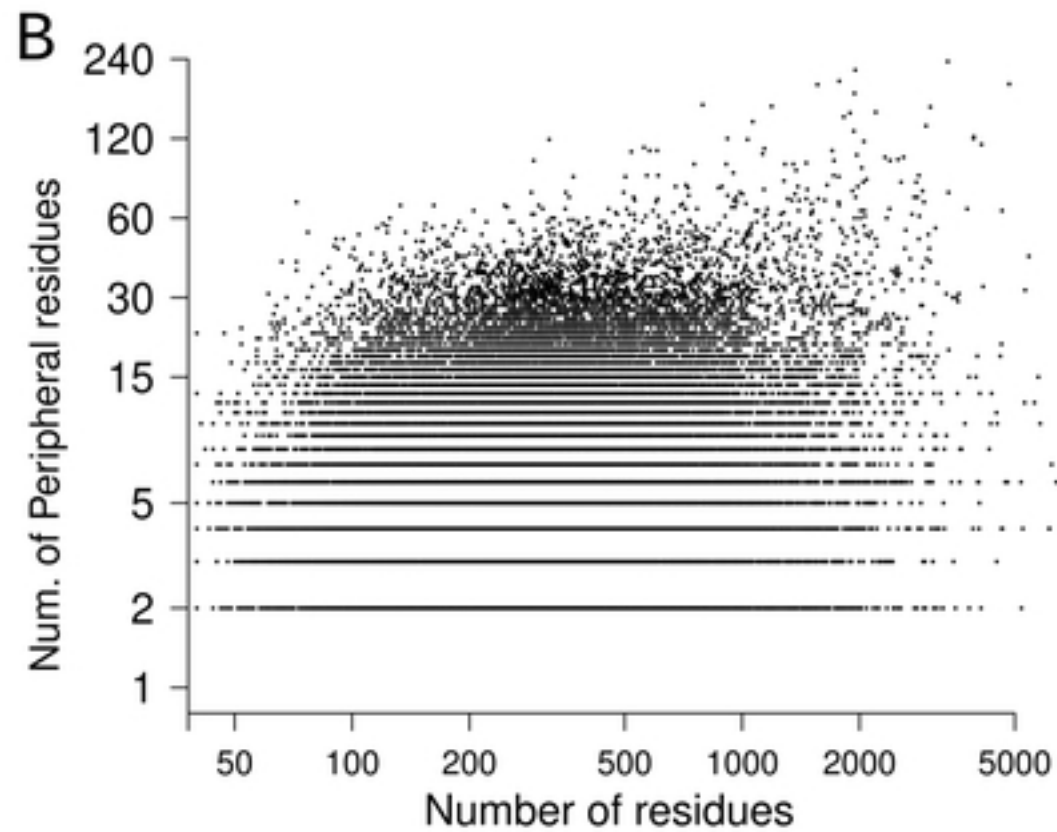

Figure 5



A

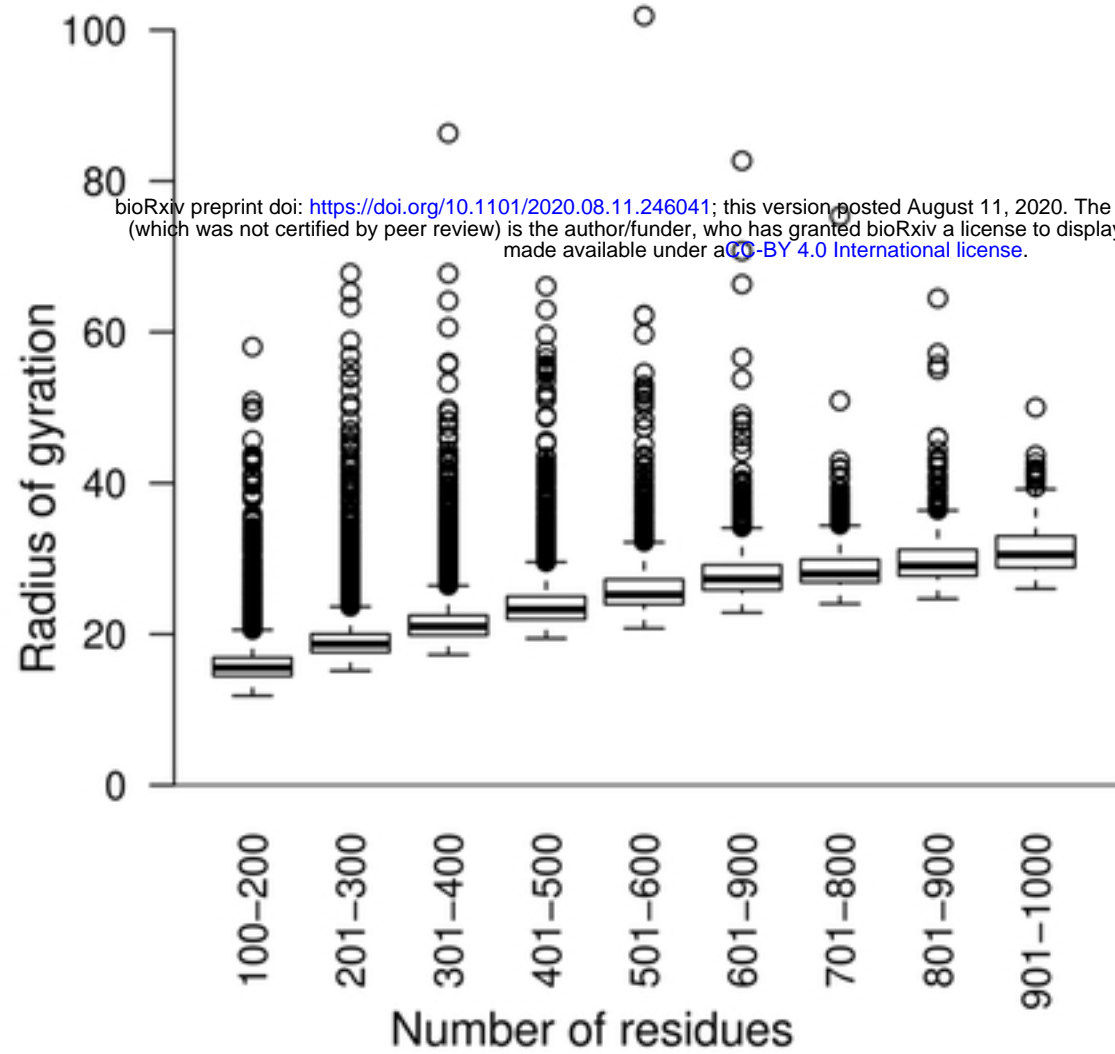

B

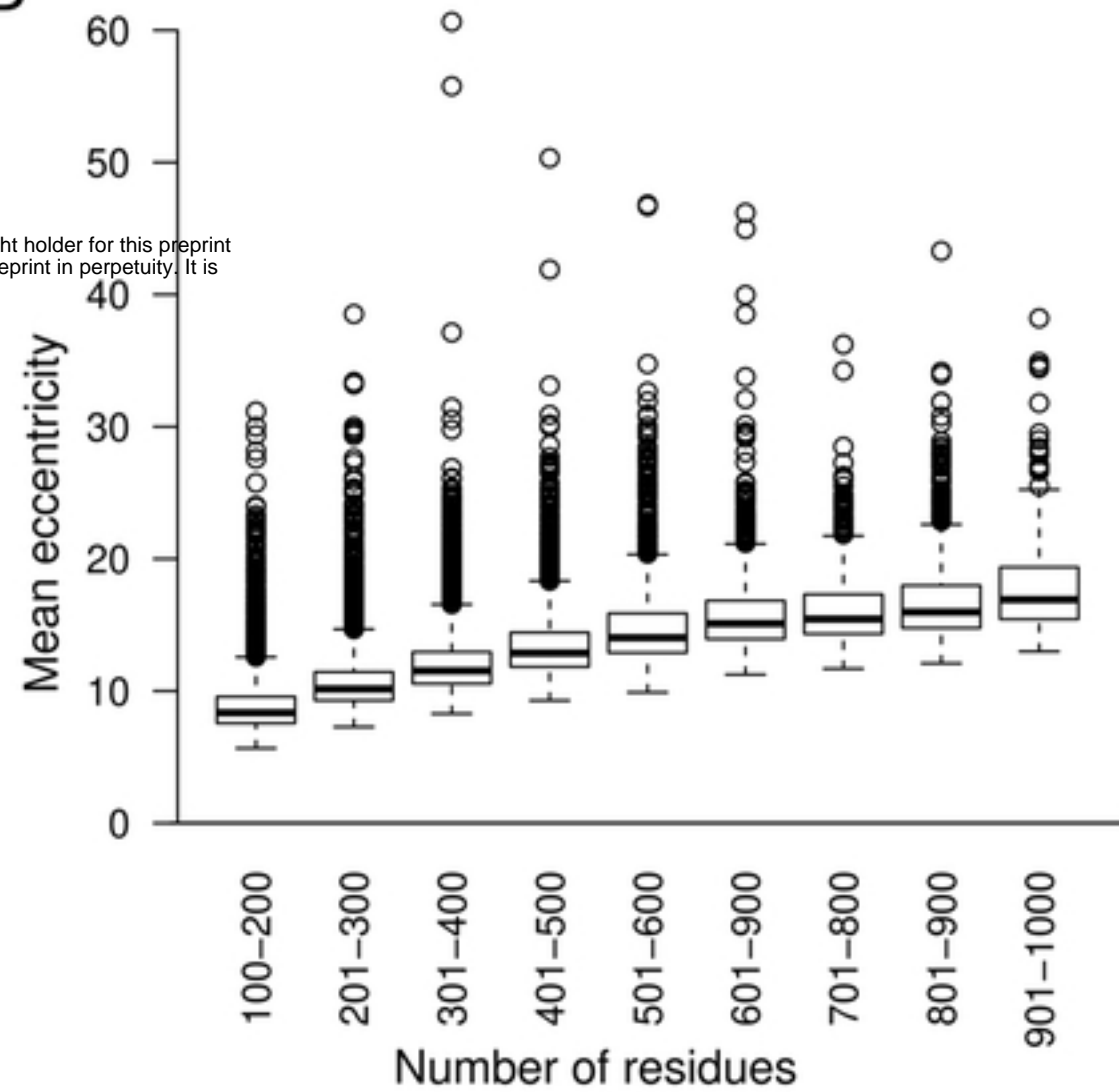

C

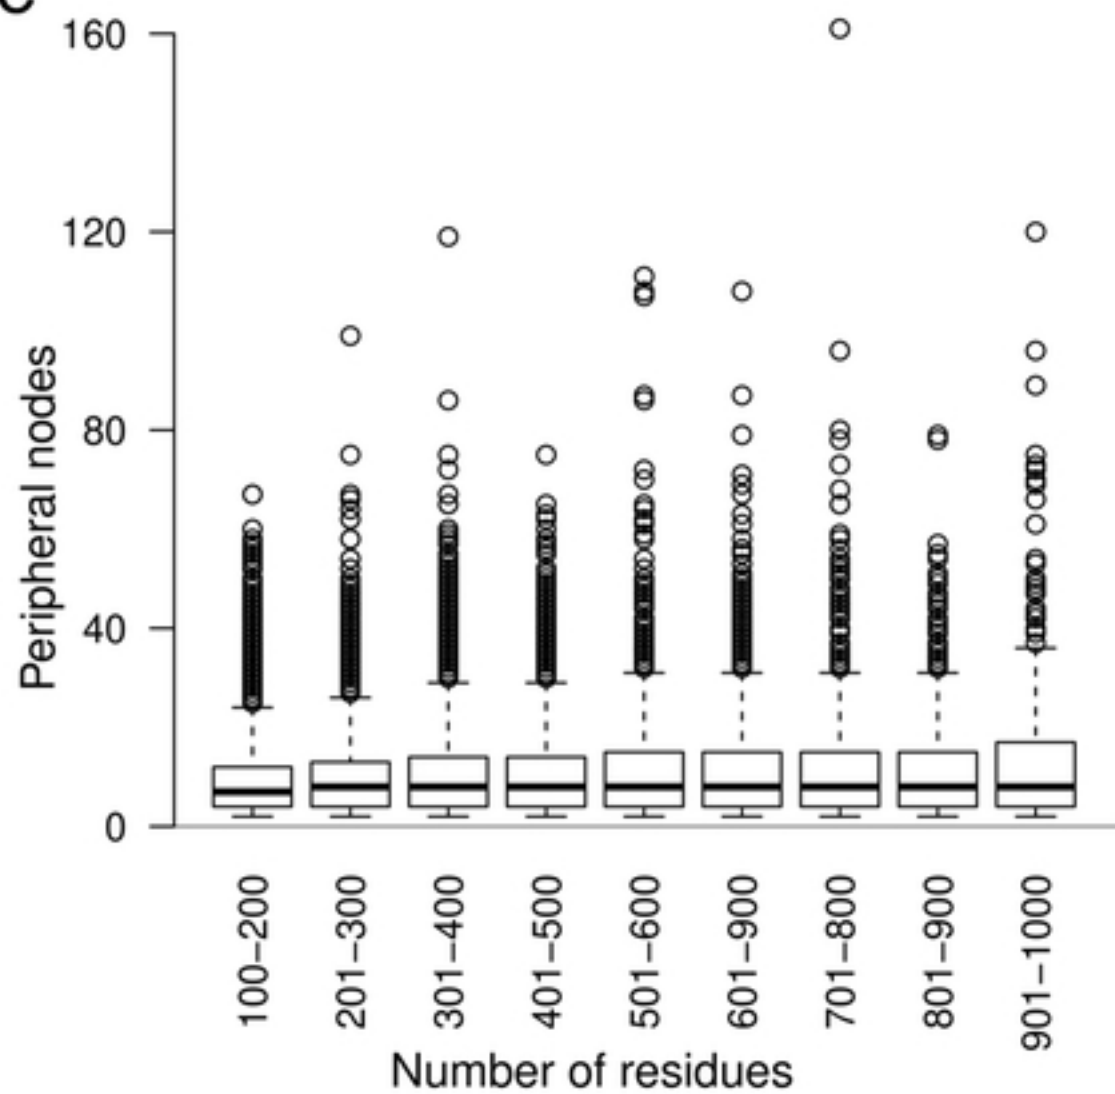

D

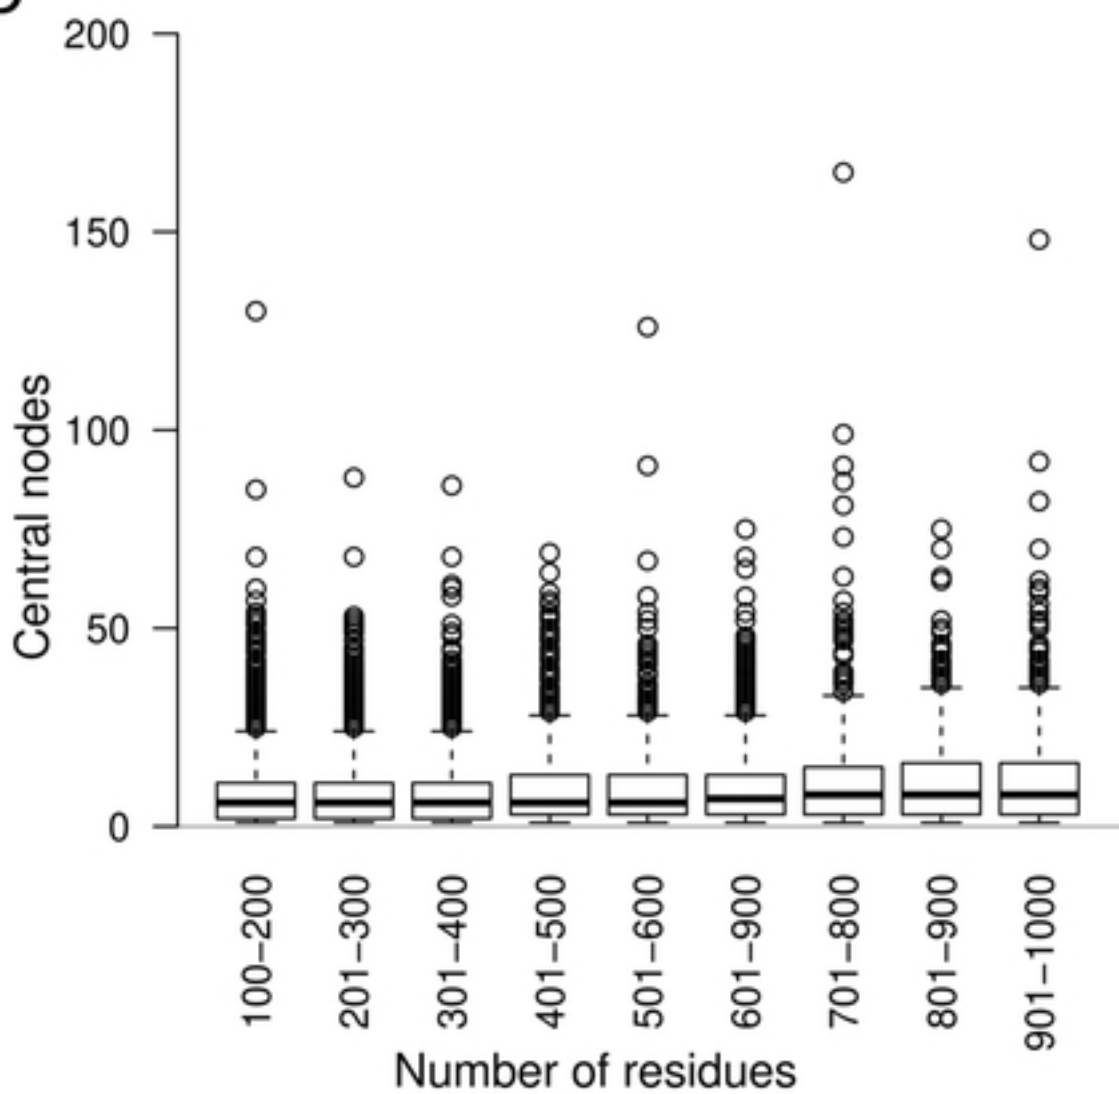

Figure 6

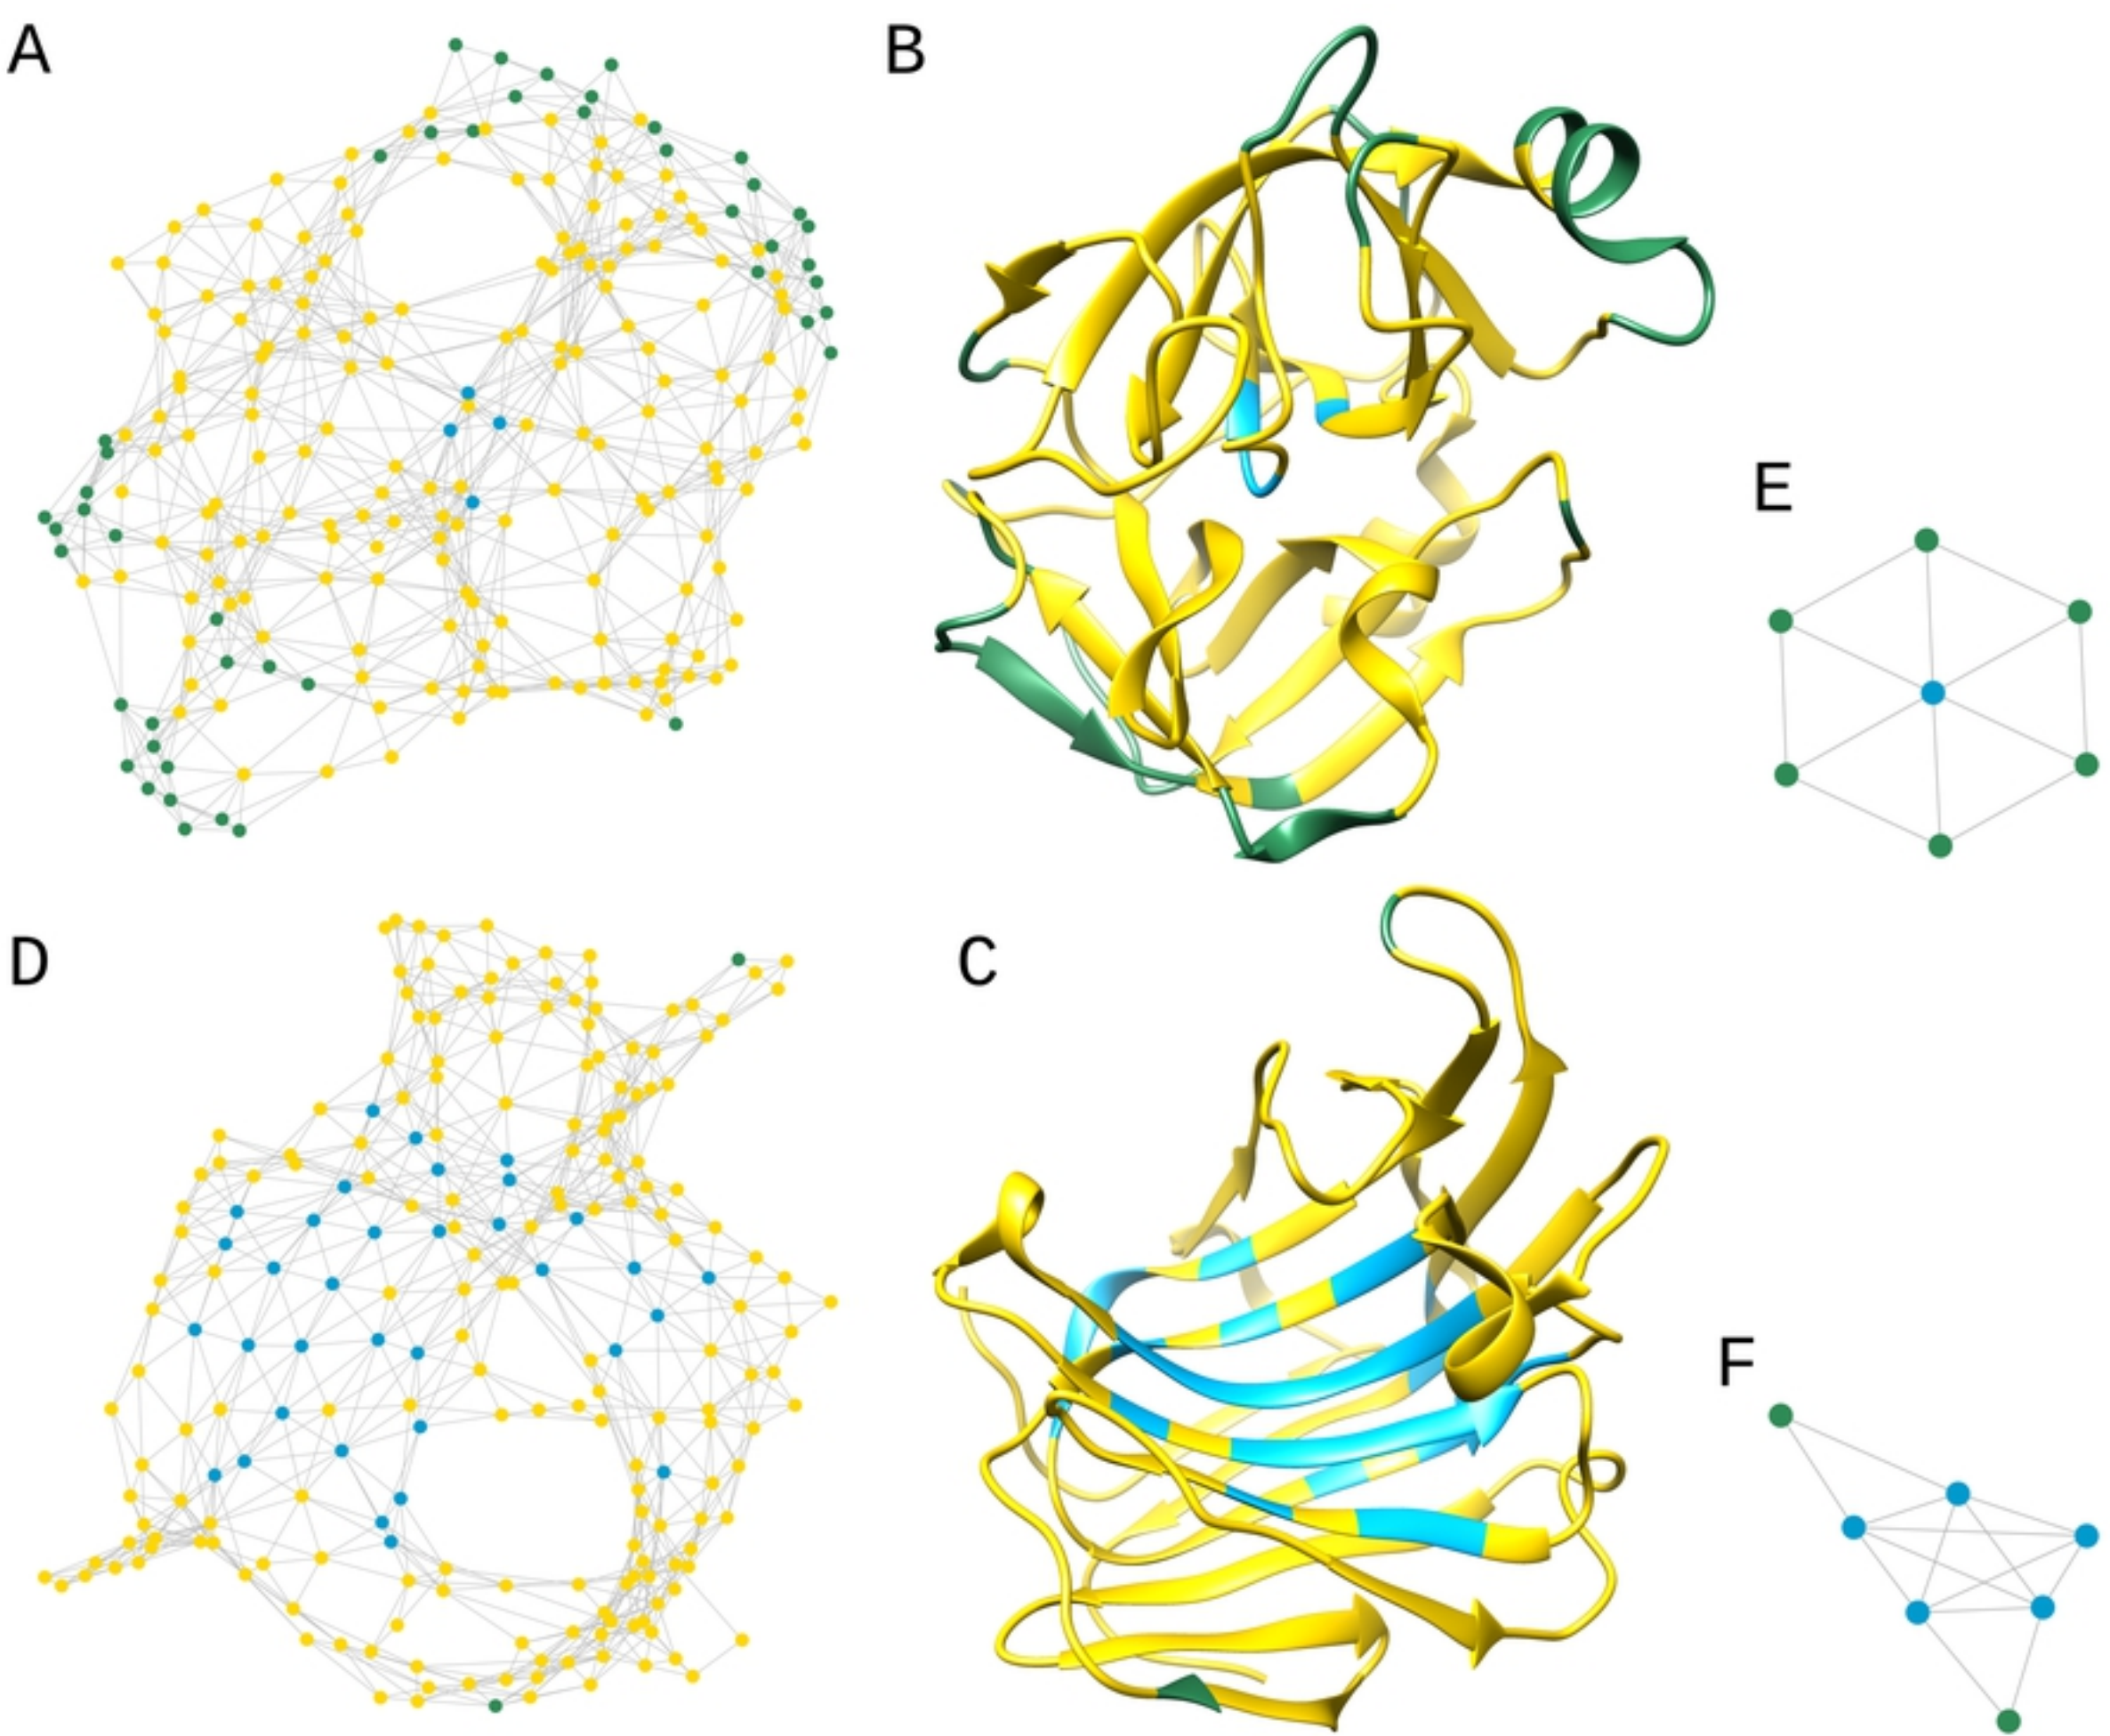

Figure 7

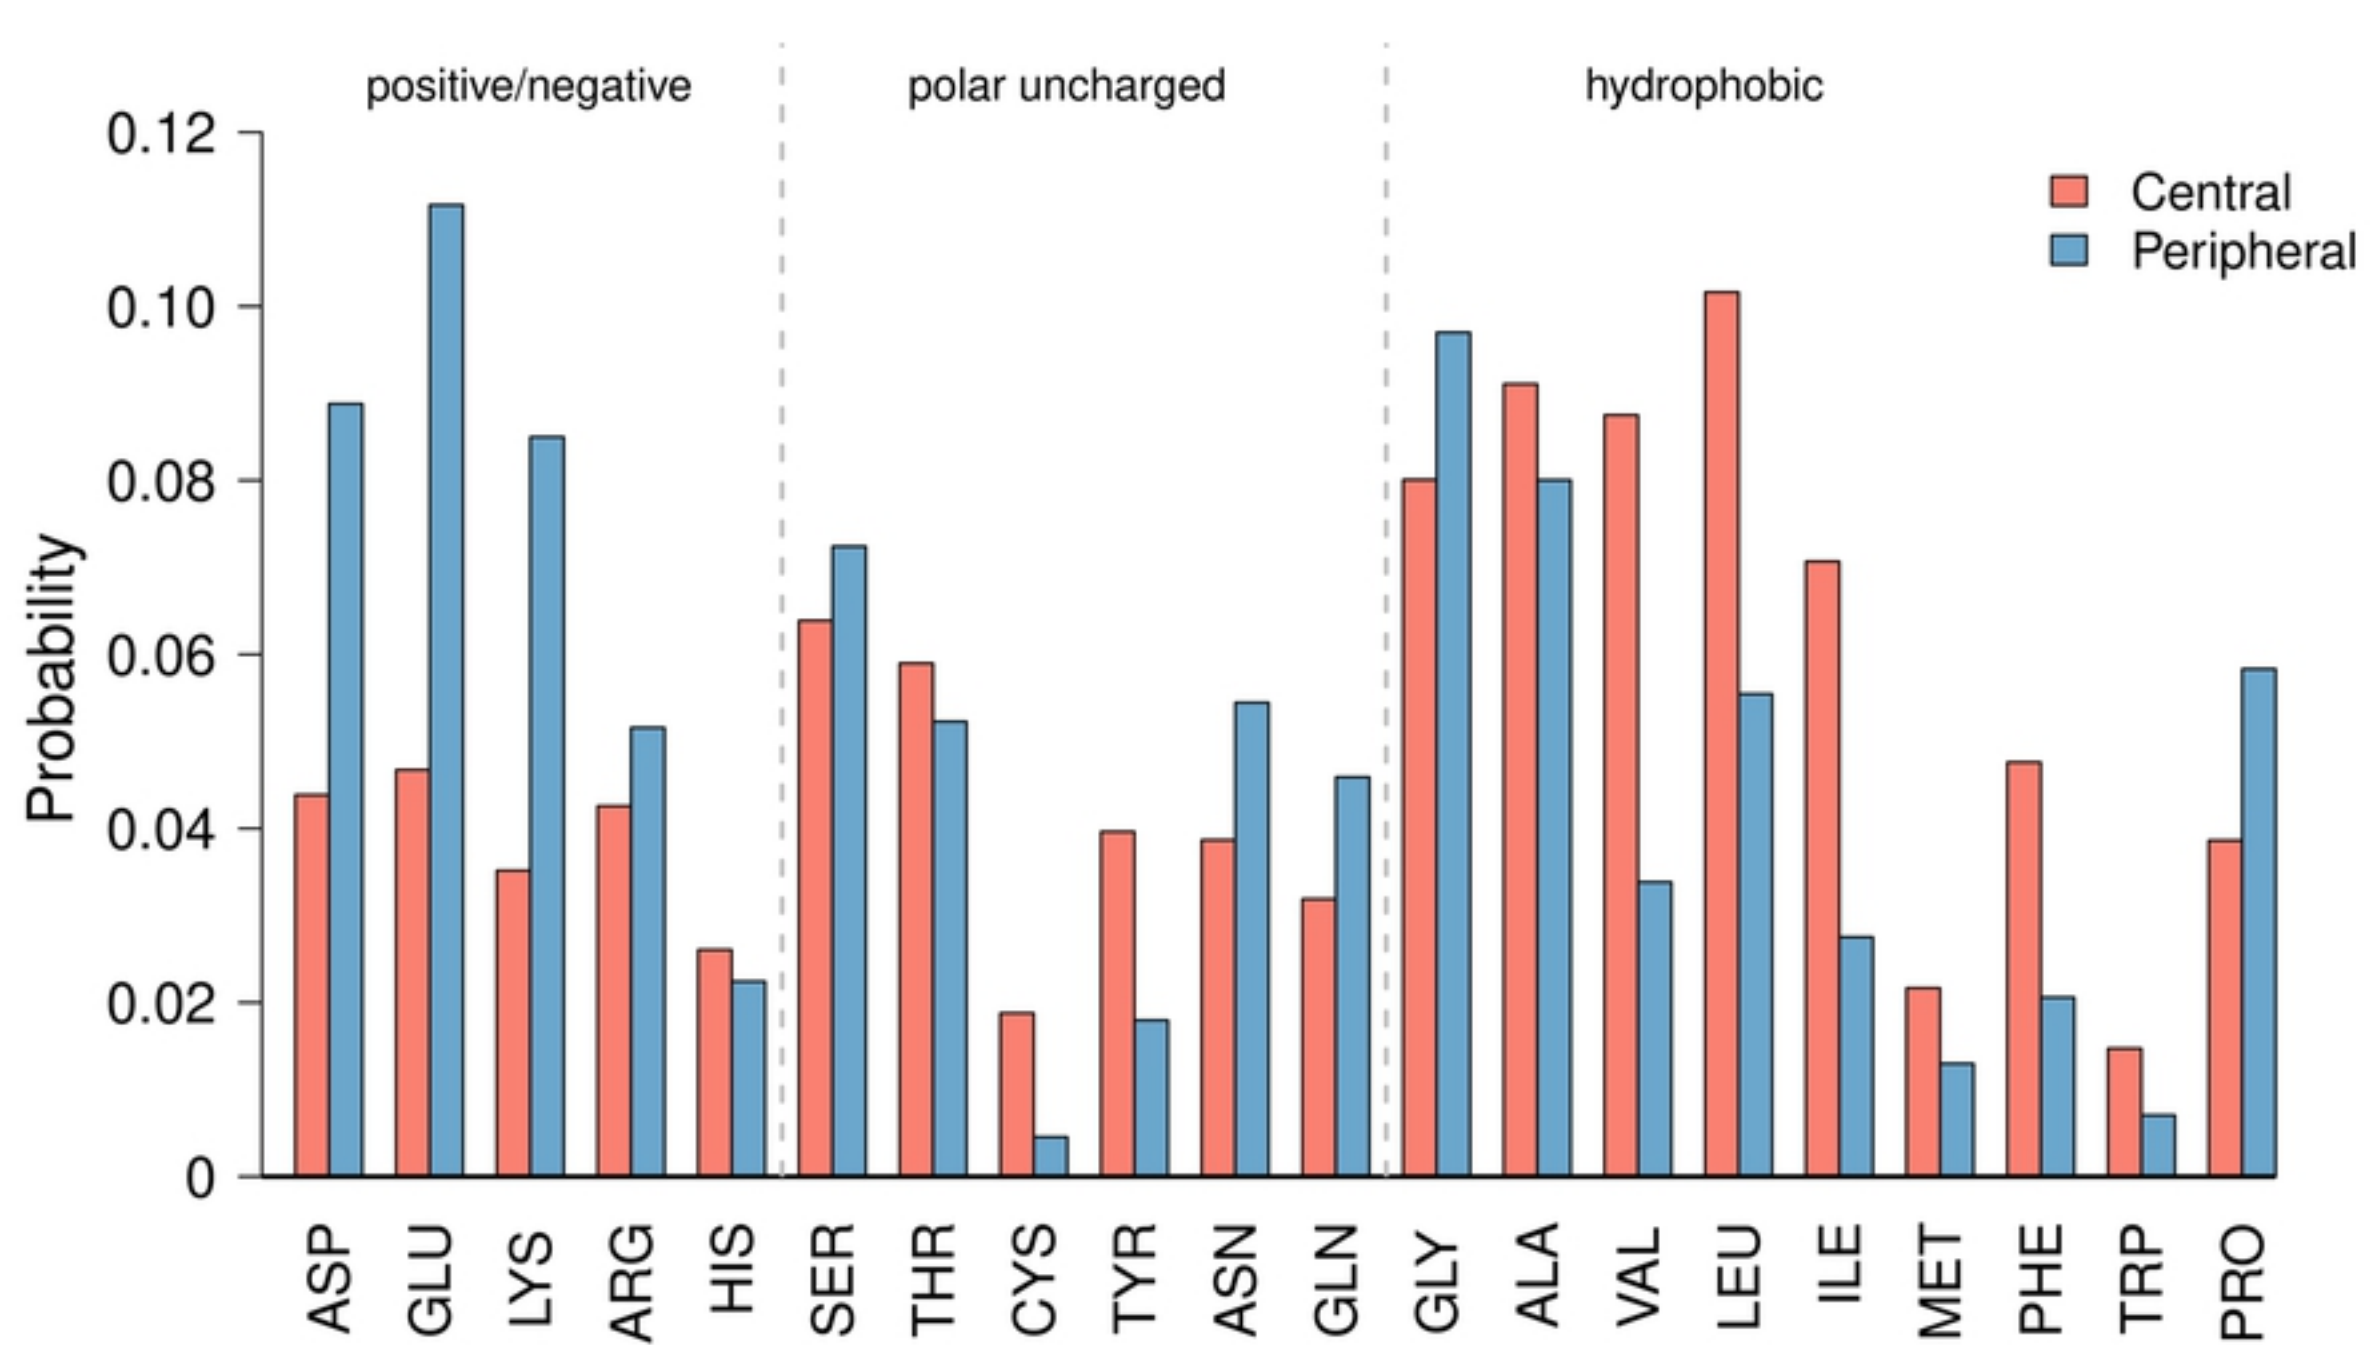

Figure 8
